# Supplementary material for: Nutrient-Driven O-GlcNAcylation at Promoters Impacts Genome-Wide RNA Pol II Distribution
Source: Front Endocrinol (Lausanne). 2018 Sep 10;9:521. doi: 10.3389/fendo.2018.00521 (PMC6139338; doi:10.3389/fendo.2018.00521)
Supplement: Supplementary file 1 [file Table_1.XLSX]

## Sheet: 827 O-GlcNAc Marked
Supplementary Table 1: Gene lists. All gene lists referenced in the text are provided as separate tabs with tab labels matching text descriptions.
WBGene00000066
WBGene00000068
WBGene00000086
WBGene00000095
WBGene00000103
WBGene00000105
WBGene00000137
WBGene00000149
WBGene00000196
WBGene00000225
WBGene00000240
WBGene00000368
WBGene00000371
WBGene00000383
WBGene00000408
WBGene00000430
WBGene00000459
WBGene00000472
WBGene00000473
WBGene00000509
WBGene00000545
WBGene00000549
WBGene00000553
WBGene00000554
WBGene00000565
WBGene00000789
WBGene00000802
WBGene00000833
WBGene00000896
WBGene00000899
WBGene00000901
WBGene00000910
WBGene00000912
WBGene00000915
WBGene00000938
WBGene00000958
WBGene00000988
WBGene00001008
WBGene00001023
WBGene00001032
WBGene00001081
WBGene00001082
WBGene00001086
WBGene00001089
WBGene00001115
WBGene00001130
WBGene00001137
WBGene00001145
WBGene00001149
WBGene00001151
WBGene00001167
WBGene00001169
WBGene00001172
WBGene00001178
WBGene00001179
WBGene00001189
WBGene00001194
WBGene00001196
WBGene00001208
WBGene00001219
WBGene00001259
WBGene00001329
WBGene00001398
WBGene00001489
WBGene00001493
WBGene00001494
WBGene00001502
WBGene00001558
WBGene00001561
WBGene00001562
WBGene00001565
WBGene00001577
WBGene00001602
WBGene00001604
WBGene00001669
WBGene00001679
WBGene00001684
WBGene00001685
WBGene00001708
WBGene00001726
WBGene00001745
WBGene00001747
WBGene00001748
WBGene00001851
WBGene00001858
WBGene00001898
WBGene00001946
WBGene00001966
WBGene00001971
WBGene00001972
WBGene00001993
WBGene00002005
WBGene00002007
WBGene00002015
WBGene00002016
WBGene00002018
WBGene00002020
WBGene00002024
WBGene00002025
WBGene00002045
WBGene00002061
WBGene00002065
WBGene00002069
WBGene00002077
WBGene00002078
WBGene00002179
WBGene00002187
WBGene00002207
WBGene00002210
WBGene00002215
WBGene00002224
WBGene00002263
WBGene00002265
WBGene00002335
WBGene00002344
WBGene00002363
WBGene00002583
WBGene00002980
WBGene00002981
WBGene00003009
WBGene00003014
WBGene00003026
WBGene00003040
WBGene00003052
WBGene00003053
WBGene00003124
WBGene00003136
WBGene00003149
WBGene00003162
WBGene00003163
WBGene00003182
WBGene00003196
WBGene00003209
WBGene00003218
WBGene00003228
WBGene00003237
WBGene00003368
WBGene00003370
WBGene00003371
WBGene00003374
WBGene00003378
WBGene00003443
WBGene00003476
WBGene00003495
WBGene00003514
WBGene00003519
WBGene00003597
WBGene00003598
WBGene00003599
WBGene00003602
WBGene00003609
WBGene00003613
WBGene00003618
WBGene00003620
WBGene00003626
WBGene00003630
WBGene00003632
WBGene00003638
WBGene00003639
WBGene00003640
WBGene00003648
WBGene00003653
WBGene00003660
WBGene00003674
WBGene00003675
WBGene00003695
WBGene00003697
WBGene00003710
WBGene00003720
WBGene00003735
WBGene00003769
WBGene00003806
WBGene00003825
WBGene00003827
WBGene00003830
WBGene00003858
WBGene00003903
WBGene00003904
WBGene00003915
WBGene00003917
WBGene00003920
WBGene00003948
WBGene00003954
WBGene00003963
WBGene00003965
WBGene00004032
WBGene00004040
WBGene00004088
WBGene00004116
WBGene00004121
WBGene00004126
WBGene00004134
WBGene00004136
WBGene00004147
WBGene00004152
WBGene00004167
WBGene00004182
WBGene00004191
WBGene00004245
WBGene00004258
WBGene00004266
WBGene00004268
WBGene00004271
WBGene00004276
WBGene00004277
WBGene00004296
WBGene00004319
WBGene00004326
WBGene00004342
WBGene00004349
WBGene00004363
WBGene00004414
WBGene00004423
WBGene00004432
WBGene00004441
WBGene00004449
WBGene00004457
WBGene00004474
WBGene00004485
WBGene00004506
WBGene00004682
WBGene00004703
WBGene00004719
WBGene00004743
WBGene00004829
WBGene00004856
WBGene00004862
WBGene00004893
WBGene00004899
WBGene00004909
WBGene00004924
WBGene00004949
WBGene00004951
WBGene00005026
WBGene00005183
WBGene00005228
WBGene00006331
WBGene00006351
WBGene00006352
WBGene00006363
WBGene00006369
WBGene00006402
WBGene00006423
WBGene00006443
WBGene00006460
WBGene00006478
WBGene00006510
WBGene00006527
WBGene00006528
WBGene00006594
WBGene00006607
WBGene00006608
WBGene00006702
WBGene00006705
WBGene00006720
WBGene00006727
WBGene00006739
WBGene00006751
WBGene00006753
WBGene00006755
WBGene00006759
WBGene00006760
WBGene00006772
WBGene00006778
WBGene00006786
WBGene00006791
WBGene00006794
WBGene00006796
WBGene00006797
WBGene00006803
WBGene00006808
WBGene00006818
WBGene00006831
WBGene00006833
WBGene00006836
WBGene00006839
WBGene00006840
WBGene00006843
WBGene00006863
WBGene00006914
WBGene00006921
WBGene00006959
WBGene00006978
WBGene00006986
WBGene00006996
WBGene00007008
WBGene00007030
WBGene00007042
WBGene00007044
WBGene00007047
WBGene00007054
WBGene00007084
WBGene00007085
WBGene00007158
WBGene00007175
WBGene00007189
WBGene00007193
WBGene00007226
WBGene00007267
WBGene00007270
WBGene00007287
WBGene00007330
WBGene00007332
WBGene00007352
WBGene00007356
WBGene00007365
WBGene00007366
WBGene00007388
WBGene00007405
WBGene00007443
WBGene00007444
WBGene00007476
WBGene00007492
WBGene00007529
WBGene00007532
WBGene00007591
WBGene00007645
WBGene00007646
WBGene00007666
WBGene00007713
WBGene00007812
WBGene00007837
WBGene00007877
WBGene00007878
WBGene00007882
WBGene00007898
WBGene00007899
WBGene00007923
WBGene00007924
WBGene00008110
WBGene00008143
WBGene00008145
WBGene00008205
WBGene00008206
WBGene00008214
WBGene00008224
WBGene00008408
WBGene00008412
WBGene00008419
WBGene00008436
WBGene00008439
WBGene00008446
WBGene00008488
WBGene00008505
WBGene00008530
WBGene00008531
WBGene00008549
WBGene00008586
WBGene00008587
WBGene00008622
WBGene00008677
WBGene00008745
WBGene00008856
WBGene00008857
WBGene00008915
WBGene00008919
WBGene00008920
WBGene00008921
WBGene00008922
WBGene00008925
WBGene00008926
WBGene00008940
WBGene00008948
WBGene00008951
WBGene00009050
WBGene00009067
WBGene00009068
WBGene00009100
WBGene00009119
WBGene00009120
WBGene00009126
WBGene00009127
WBGene00009142
WBGene00009156
WBGene00009176
WBGene00009260
WBGene00009435
WBGene00009449
WBGene00009534
WBGene00009574
WBGene00009580
WBGene00009583
WBGene00009584
WBGene00009587
WBGene00009588
WBGene00009589
WBGene00009628
WBGene00009660
WBGene00009691
WBGene00009692
WBGene00009722
WBGene00009724
WBGene00009729
WBGene00009772
WBGene00009781
WBGene00009793
WBGene00009797
WBGene00009812
WBGene00009920
WBGene00009974
WBGene00009975
WBGene00009977
WBGene00010037
WBGene00010059
WBGene00010074
WBGene00010117
WBGene00010174
WBGene00010199
WBGene00010221
WBGene00010244
WBGene00010259
WBGene00010272
WBGene00010273
WBGene00010337
WBGene00010421
WBGene00010425
WBGene00010427
WBGene00010434
WBGene00010447
WBGene00010476
WBGene00010480
WBGene00010681
WBGene00010700
WBGene00010701
WBGene00010725
WBGene00010756
WBGene00010770
WBGene00010790
WBGene00010796
WBGene00010867
WBGene00010868
WBGene00010878
WBGene00010879
WBGene00010882
WBGene00010902
WBGene00010903
WBGene00010911
WBGene00010919
WBGene00010935
WBGene00010999
WBGene00011026
WBGene00011027
WBGene00011097
WBGene00011105
WBGene00011119
WBGene00011231
WBGene00011232
WBGene00011234
WBGene00011276
WBGene00011277
WBGene00011291
WBGene00011292
WBGene00011300
WBGene00011304
WBGene00011323
WBGene00011352
WBGene00011440
WBGene00011449
WBGene00011482
WBGene00011511
WBGene00011531
WBGene00011564
WBGene00011574
WBGene00011632
WBGene00011662
WBGene00011676
WBGene00011681
WBGene00011729
WBGene00011730
WBGene00011737
WBGene00011740
WBGene00011741
WBGene00011767
WBGene00011815
WBGene00011821
WBGene00011849
WBGene00011864
WBGene00011920
WBGene00011934
WBGene00011954
WBGene00011956
WBGene00011977
WBGene00012031
WBGene00012107
WBGene00012113
WBGene00012136
WBGene00012137
WBGene00012139
WBGene00012140
WBGene00012141
WBGene00012194
WBGene00012203
WBGene00012216
WBGene00012221
WBGene00012343
WBGene00012345
WBGene00012348
WBGene00012376
WBGene00012476
WBGene00012477
WBGene00012512
WBGene00012528
WBGene00012584
WBGene00012585
WBGene00012591
WBGene00012593
WBGene00012700
WBGene00012701
WBGene00012717
WBGene00012759
WBGene00012825
WBGene00012850
WBGene00012852
WBGene00012853
WBGene00012929
WBGene00012982
WBGene00013020
WBGene00013213
WBGene00013303
WBGene00013356
WBGene00013530
WBGene00013531
WBGene00013532
WBGene00013638
WBGene00013734
WBGene00013735
WBGene00013829
WBGene00013859
WBGene00013860
WBGene00013898
WBGene00013899
WBGene00014004
WBGene00014013
WBGene00014014
WBGene00014016
WBGene00014017
WBGene00014018
WBGene00014021
WBGene00014058
WBGene00014095
WBGene00014096
WBGene00014155
WBGene00014181
WBGene00014213
WBGene00014225
WBGene00015007
WBGene00015010
WBGene00015115
WBGene00015163
WBGene00015170
WBGene00015172
WBGene00015217
WBGene00015248
WBGene00015251
WBGene00015276
WBGene00015277
WBGene00015336
WBGene00015350
WBGene00015441
WBGene00015453
WBGene00015484
WBGene00015547
WBGene00015551
WBGene00015552
WBGene00015684
WBGene00015748
WBGene00015801
WBGene00015916
WBGene00015927
WBGene00015928
WBGene00015978
WBGene00016006
WBGene00016017
WBGene00016033
WBGene00016040
WBGene00016041
WBGene00016111
WBGene00016115
WBGene00016119
WBGene00016121
WBGene00016150
WBGene00016158
WBGene00016173
WBGene00016187
WBGene00016188
WBGene00016193
WBGene00016201
WBGene00016289
WBGene00016378
WBGene00016379
WBGene00016384
WBGene00016407
WBGene00016421
WBGene00016432
WBGene00016435
WBGene00016448
WBGene00016496
WBGene00016501
WBGene00016540
WBGene00016562
WBGene00016603
WBGene00016609
WBGene00016610
WBGene00016612
WBGene00016630
WBGene00016716
WBGene00016794
WBGene00016866
WBGene00016893
WBGene00016894
WBGene00016898
WBGene00016937
WBGene00016961
WBGene00016964
WBGene00016997
WBGene00016998
WBGene00017066
WBGene00017121
WBGene00017171
WBGene00017190
WBGene00017220
WBGene00017262
WBGene00017294
WBGene00017303
WBGene00017422
WBGene00017423
WBGene00017430
WBGene00017536
WBGene00017565
WBGene00017642
WBGene00017643
WBGene00017659
WBGene00017675
WBGene00017698
WBGene00017699
WBGene00017700
WBGene00017702
WBGene00017789
WBGene00017826
WBGene00017834
WBGene00017882
WBGene00017898
WBGene00017914
WBGene00017915
WBGene00017920
WBGene00017924
WBGene00017925
WBGene00017953
WBGene00017964
WBGene00017979
WBGene00018008
WBGene00018070
WBGene00018187
WBGene00018285
WBGene00018290
WBGene00018291
WBGene00018399
WBGene00018400
WBGene00018464
WBGene00018465
WBGene00018490
WBGene00018491
WBGene00018509
WBGene00018518
WBGene00018532
WBGene00018564
WBGene00018572
WBGene00018579
WBGene00018586
WBGene00018597
WBGene00018598
WBGene00018604
WBGene00018606
WBGene00018615
WBGene00018689
WBGene00018701
WBGene00018745
WBGene00018750
WBGene00018755
WBGene00018756
WBGene00018757
WBGene00018834
WBGene00018868
WBGene00018872
WBGene00018953
WBGene00019185
WBGene00019209
WBGene00019271
WBGene00019294
WBGene00019306
WBGene00019317
WBGene00019324
WBGene00019327
WBGene00019329
WBGene00019351
WBGene00019408
WBGene00019432
WBGene00019466
WBGene00019489
WBGene00019516
WBGene00019571
WBGene00019572
WBGene00019612
WBGene00019615
WBGene00019645
WBGene00019657
WBGene00019719
WBGene00019758
WBGene00019760
WBGene00019767
WBGene00019770
WBGene00019780
WBGene00019781
WBGene00019816
WBGene00019831
WBGene00019869
WBGene00019872
WBGene00019877
WBGene00019881
WBGene00019888
WBGene00019893
WBGene00019899
WBGene00019900
WBGene00019946
WBGene00019947
WBGene00019953
WBGene00019954
WBGene00019960
WBGene00019967
WBGene00020007
WBGene00020013
WBGene00020020
WBGene00020050
WBGene00020085
WBGene00020092
WBGene00020131
WBGene00020142
WBGene00020153
WBGene00020209
WBGene00020210
WBGene00020214
WBGene00020251
WBGene00020279
WBGene00020314
WBGene00020315
WBGene00020316
WBGene00020324
WBGene00020361
WBGene00020362
WBGene00020363
WBGene00020427
WBGene00020447
WBGene00020466
WBGene00020507
WBGene00020572
WBGene00020619
WBGene00020679
WBGene00020696
WBGene00020706
WBGene00020762
WBGene00020824
WBGene00020827
WBGene00020921
WBGene00020923
WBGene00020930
WBGene00020947
WBGene00021047
WBGene00021050
WBGene00021060
WBGene00021068
WBGene00021202
WBGene00021248
WBGene00021285
WBGene00021328
WBGene00021369
WBGene00021371
WBGene00021451
WBGene00021469
WBGene00021533
WBGene00021629
WBGene00021637
WBGene00021643
WBGene00021691
WBGene00021733
WBGene00021803
WBGene00021808
WBGene00021890
WBGene00021891
WBGene00021906
WBGene00021952
WBGene00022078
WBGene00022098
WBGene00022116
WBGene00022139
WBGene00022233
WBGene00022306
WBGene00022357
WBGene00022373
WBGene00022382
WBGene00022386
WBGene00022396
WBGene00022452
WBGene00022453
WBGene00022457
WBGene00022473
WBGene00022500
WBGene00022639
WBGene00022643
WBGene00022660
WBGene00022668
WBGene00022718
WBGene00022721
WBGene00022746
WBGene00022748
WBGene00022750
WBGene00022752
WBGene00022782
WBGene00022798
WBGene00022800
WBGene00022805
WBGene00022812
WBGene00022856
WBGene00022887
WBGene00023405
WBGene00044423
WBGene00044648
Since definition of 827 genes by Love et al., one gene model is no longer valid and has been removed resulting in 826 genes total

## Sheet: 691 Baugh Active
WBGene00000017
WBGene00000066
WBGene00000067
WBGene00000084
WBGene00000107
WBGene00000111
WBGene00000120
WBGene00000122
WBGene00000149
WBGene00000182
WBGene00000183
WBGene00000214
WBGene00000216
WBGene00000217
WBGene00000219
WBGene00000221
WBGene00000224
WBGene00000263
WBGene00000273
WBGene00000282
WBGene00000285
WBGene00000286
WBGene00000298
WBGene00000379
WBGene00000390
WBGene00000391
WBGene00000443
WBGene00000508
WBGene00000599
WBGene00000602
WBGene00000611
WBGene00000616
WBGene00000618
WBGene00000641
WBGene00000643
WBGene00000665
WBGene00000667
WBGene00000669
WBGene00000677
WBGene00000681
WBGene00000685
WBGene00000699
WBGene00000704
WBGene00000707
WBGene00000717
WBGene00000719
WBGene00000720
WBGene00000727
WBGene00000728
WBGene00000733
WBGene00000739
WBGene00000776
WBGene00000779
WBGene00000783
WBGene00000784
WBGene00000785
WBGene00000786
WBGene00000788
WBGene00000789
WBGene00000835
WBGene00000875
WBGene00000883
WBGene00000891
WBGene00000913
WBGene00000981
WBGene00000988
WBGene00000991
WBGene00001005
WBGene00001008
WBGene00001030
WBGene00001067
WBGene00001074
WBGene00001080
WBGene00001086
WBGene00001087
WBGene00001137
WBGene00001160
WBGene00001169
WBGene00001189
WBGene00001243
WBGene00001244
WBGene00001345
WBGene00001385
WBGene00001395
WBGene00001427
WBGene00001431
WBGene00001452
WBGene00001476
WBGene00001480
WBGene00001496
WBGene00001510
WBGene00001561
WBGene00001562
WBGene00001564
WBGene00001604
WBGene00001623
WBGene00001648
WBGene00001669
WBGene00001671
WBGene00001709
WBGene00001713
WBGene00001724
WBGene00001730
WBGene00001753
WBGene00001754
WBGene00001755
WBGene00001840
WBGene00001851
WBGene00001852
WBGene00001853
WBGene00001854
WBGene00001875
WBGene00001879
WBGene00001898
WBGene00001905
WBGene00001911
WBGene00001934
WBGene00001935
WBGene00001941
WBGene00001945
WBGene00001946
WBGene00001993
WBGene00001999
WBGene00002005
WBGene00002007
WBGene00002008
WBGene00002011
WBGene00002016
WBGene00002018
WBGene00002021
WBGene00002048
WBGene00002069
WBGene00002179
WBGene00002182
WBGene00002190
WBGene00002203
WBGene00002210
WBGene00002214
WBGene00002216
WBGene00002253
WBGene00002258
WBGene00002265
WBGene00002268
WBGene00002273
WBGene00002344
WBGene00002978
WBGene00002981
WBGene00003009
WBGene00003040
WBGene00003053
WBGene00003090
WBGene00003112
WBGene00003132
WBGene00003163
WBGene00003239
WBGene00003369
WBGene00003370
WBGene00003371
WBGene00003378
WBGene00003559
WBGene00003597
WBGene00003603
WBGene00003609
WBGene00003619
WBGene00003620
WBGene00003674
WBGene00003675
WBGene00003678
WBGene00003691
WBGene00003725
WBGene00003735
WBGene00003741
WBGene00003749
WBGene00003759
WBGene00003762
WBGene00003766
WBGene00003767
WBGene00003769
WBGene00003771
WBGene00003773
WBGene00003796
WBGene00003825
WBGene00003828
WBGene00003844
WBGene00003891
WBGene00003893
WBGene00003927
WBGene00003934
WBGene00003963
WBGene00003970
WBGene00003978
WBGene00004013
WBGene00004040
WBGene00004047
WBGene00004060
WBGene00004064
WBGene00004096
WBGene00004134
WBGene00004152
WBGene00004173
WBGene00004182
WBGene00004266
WBGene00004286
WBGene00004300
WBGene00004318
WBGene00004336
WBGene00004397
WBGene00004398
WBGene00004405
WBGene00004459
WBGene00004476
WBGene00004494
WBGene00004504
WBGene00004698
WBGene00004705
WBGene00004807
WBGene00004924
WBGene00004945
WBGene00004987
WBGene00004990
WBGene00004995
WBGene00005009
WBGene00005016
WBGene00005018
WBGene00006321
WBGene00006331
WBGene00006369
WBGene00006385
WBGene00006452
WBGene00006577
WBGene00006581
WBGene00006601
WBGene00006698
WBGene00006705
WBGene00006727
WBGene00006753
WBGene00006754
WBGene00006771
WBGene00006786
WBGene00006789
WBGene00006839
WBGene00006868
WBGene00006890
WBGene00006913
WBGene00006918
WBGene00006921
WBGene00006941
WBGene00006959
WBGene00006971
WBGene00006980
WBGene00006981
WBGene00006986
WBGene00006996
WBGene00007024
WBGene00007030
WBGene00007227
WBGene00007240
WBGene00007256
WBGene00007336
WBGene00007349
WBGene00007365
WBGene00007384
WBGene00007385
WBGene00007428
WBGene00007463
WBGene00007476
WBGene00007516
WBGene00007534
WBGene00007553
WBGene00007653
WBGene00007680
WBGene00007697
WBGene00007811
WBGene00007841
WBGene00007882
WBGene00007883
WBGene00007890
WBGene00007898
WBGene00007969
WBGene00008006
WBGene00008204
WBGene00008205
WBGene00008226
WBGene00008233
WBGene00008343
WBGene00008366
WBGene00008411
WBGene00008439
WBGene00008506
WBGene00008549
WBGene00008572
WBGene00008602
WBGene00008603
WBGene00008609
WBGene00008689
WBGene00008856
WBGene00008913
WBGene00008915
WBGene00008922
WBGene00008925
WBGene00008932
WBGene00008940
WBGene00008944
WBGene00008980
WBGene00009050
WBGene00009097
WBGene00009112
WBGene00009114
WBGene00009119
WBGene00009142
WBGene00009177
WBGene00009190
WBGene00009221
WBGene00009237
WBGene00009311
WBGene00009374
WBGene00009390
WBGene00009440
WBGene00009484
WBGene00009523
WBGene00009529
WBGene00009534
WBGene00009558
WBGene00009578
WBGene00009628
WBGene00009642
WBGene00009660
WBGene00009661
WBGene00009666
WBGene00009722
WBGene00009723
WBGene00009724
WBGene00009773
WBGene00009785
WBGene00009803
WBGene00009882
WBGene00009957
WBGene00009973
WBGene00009978
WBGene00009982
WBGene00010062
WBGene00010133
WBGene00010174
WBGene00010175
WBGene00010244
WBGene00010260
WBGene00010262
WBGene00010290
WBGene00010291
WBGene00010296
WBGene00010317
WBGene00010337
WBGene00010406
WBGene00010440
WBGene00010503
WBGene00010507
WBGene00010597
WBGene00010628
WBGene00010631
WBGene00010681
WBGene00010700
WBGene00010740
WBGene00010790
WBGene00010791
WBGene00010879
WBGene00010976
WBGene00010990
WBGene00011015
WBGene00011026
WBGene00011059
WBGene00011097
WBGene00011102
WBGene00011115
WBGene00011212
WBGene00011230
WBGene00011232
WBGene00011250
WBGene00011284
WBGene00011286
WBGene00011300
WBGene00011304
WBGene00011321
WBGene00011330
WBGene00011337
WBGene00011392
WBGene00011446
WBGene00011474
WBGene00011480
WBGene00011561
WBGene00011573
WBGene00011662
WBGene00011692
WBGene00011720
WBGene00011733
WBGene00011736
WBGene00011775
WBGene00011798
WBGene00011801
WBGene00011826
WBGene00011954
WBGene00011977
WBGene00012100
WBGene00012101
WBGene00012113
WBGene00012136
WBGene00012140
WBGene00012144
WBGene00012194
WBGene00012208
WBGene00012216
WBGene00012221
WBGene00012253
WBGene00012326
WBGene00012339
WBGene00012341
WBGene00012347
WBGene00012362
WBGene00012363
WBGene00012382
WBGene00012383
WBGene00012471
WBGene00012476
WBGene00012477
WBGene00012484
WBGene00012546
WBGene00012615
WBGene00012646
WBGene00012648
WBGene00012717
WBGene00012735
WBGene00012760
WBGene00012783
WBGene00012825
WBGene00012840
WBGene00012853
WBGene00012859
WBGene00012885
WBGene00012921
WBGene00012982
WBGene00012988
WBGene00013039
WBGene00013093
WBGene00013119
WBGene00013181
WBGene00013284
WBGene00013307
WBGene00013311
WBGene00013382
WBGene00013438
WBGene00013489
WBGene00013499
WBGene00013515
WBGene00013575
WBGene00013647
WBGene00013703
WBGene00013878
WBGene00013882
WBGene00013898
WBGene00013900
WBGene00013926
WBGene00014000
WBGene00014004
WBGene00014017
WBGene00014092
WBGene00014095
WBGene00014258
WBGene00014793
WBGene00014989
WBGene00015074
WBGene00015075
WBGene00015116
WBGene00015149
WBGene00015163
WBGene00015168
WBGene00015172
WBGene00015251
WBGene00015285
WBGene00015324
WBGene00015329
WBGene00015339
WBGene00015350
WBGene00015354
WBGene00015410
WBGene00015453
WBGene00015468
WBGene00015514
WBGene00015549
WBGene00015551
WBGene00015619
WBGene00015801
WBGene00015823
WBGene00015934
WBGene00015947
WBGene00015978
WBGene00016048
WBGene00016052
WBGene00016061
WBGene00016115
WBGene00016119
WBGene00016172
WBGene00016250
WBGene00016264
WBGene00016272
WBGene00016326
WBGene00016379
WBGene00016407
WBGene00016438
WBGene00016469
WBGene00016500
WBGene00016501
WBGene00016513
WBGene00016716
WBGene00016739
WBGene00016790
WBGene00016791
WBGene00016793
WBGene00016866
WBGene00016894
WBGene00016919
WBGene00016983
WBGene00016987
WBGene00016997
WBGene00017047
WBGene00017088
WBGene00017123
WBGene00017197
WBGene00017303
WBGene00017398
WBGene00017422
WBGene00017423
WBGene00017440
WBGene00017484
WBGene00017563
WBGene00017565
WBGene00017567
WBGene00017582
WBGene00017659
WBGene00017671
WBGene00017687
WBGene00017691
WBGene00017727
WBGene00017735
WBGene00017772
WBGene00017777
WBGene00017834
WBGene00017838
WBGene00017874
WBGene00017964
WBGene00017970
WBGene00017983
WBGene00017999
WBGene00018145
WBGene00018187
WBGene00018195
WBGene00018199
WBGene00018230
WBGene00018281
WBGene00018286
WBGene00018294
WBGene00018297
WBGene00018319
WBGene00018343
WBGene00018491
WBGene00018509
WBGene00018511
WBGene00018602
WBGene00018731
WBGene00018737
WBGene00018872
WBGene00018952
WBGene00019055
WBGene00019097
WBGene00019102
WBGene00019203
WBGene00019294
WBGene00019322
WBGene00019324
WBGene00019327
WBGene00019329
WBGene00019357
WBGene00019359
WBGene00019361
WBGene00019381
WBGene00019394
WBGene00019466
WBGene00019481
WBGene00019490
WBGene00019492
WBGene00019536
WBGene00019540
WBGene00019544
WBGene00019603
WBGene00019643
WBGene00019698
WBGene00019719
WBGene00019733
WBGene00019760
WBGene00019779
WBGene00019831
WBGene00019869
WBGene00019888
WBGene00019900
WBGene00019931
WBGene00019932
WBGene00019982
WBGene00020007
WBGene00020085
WBGene00020092
WBGene00020106
WBGene00020146
WBGene00020158
WBGene00020192
WBGene00020200
WBGene00020216
WBGene00020234
WBGene00020315
WBGene00020317
WBGene00020322
WBGene00020374
WBGene00020462
WBGene00020649
WBGene00020662
WBGene00020705
WBGene00020725
WBGene00020736
WBGene00020824
WBGene00020827
WBGene00020844
WBGene00020854
WBGene00020865
WBGene00020886
WBGene00020936
WBGene00021043
WBGene00021047
WBGene00021048
WBGene00021050
WBGene00021060
WBGene00021112
WBGene00021167
WBGene00021328
WBGene00021333
WBGene00021369
WBGene00021469
WBGene00021486
WBGene00021509
WBGene00021533
WBGene00021534
WBGene00021547
WBGene00021644
WBGene00021690
WBGene00021816
WBGene00021922
WBGene00021931
WBGene00022037
WBGene00022042
WBGene00022144
WBGene00022273
WBGene00022281
WBGene00022383
WBGene00022389
WBGene00022410
WBGene00022497
WBGene00022569
WBGene00022574
WBGene00022597
WBGene00022599
WBGene00022619
WBGene00022659
WBGene00022712
WBGene00022748
WBGene00022798
WBGene00022802
WBGene00022826
WBGene00022855
WBGene00022856
WBGene00043097
WBGene00043308
WBGene00044433
WBGene00044443
WBGene00044536
WBGene00044696
WBGene00044701
WBGene00045276
WBGene00045305
WBGene00045386
WBGene00045397
WBGene00185118
WBGene00194866
WBGene00195068
WBGene00195209
WBGene00195246

## Sheet: 775 Baugh Docked
WBGene00000006
WBGene00000079
WBGene00000092
WBGene00000094
WBGene00000095
WBGene00000098
WBGene00000101
WBGene00000114
WBGene00000116
WBGene00000160
WBGene00000178
WBGene00000192
WBGene00000195
WBGene00000200
WBGene00000207
WBGene00000210
WBGene00000235
WBGene00000262
WBGene00000266
WBGene00000274
WBGene00000292
WBGene00000293
WBGene00000368
WBGene00000369
WBGene00000377
WBGene00000381
WBGene00000382
WBGene00000405
WBGene00000407
WBGene00000408
WBGene00000409
WBGene00000414
WBGene00000459
WBGene00000466
WBGene00000479
WBGene00000506
WBGene00000507
WBGene00000514
WBGene00000532
WBGene00000534
WBGene00000550
WBGene00000552
WBGene00000554
WBGene00000591
WBGene00000773
WBGene00000774
WBGene00000793
WBGene00000865
WBGene00000869
WBGene00000876
WBGene00000877
WBGene00000879
WBGene00000880
WBGene00000884
WBGene00000904
WBGene00000911
WBGene00000914
WBGene00000938
WBGene00000959
WBGene00000973
WBGene00001007
WBGene00001023
WBGene00001038
WBGene00001040
WBGene00001056
WBGene00001061
WBGene00001082
WBGene00001161
WBGene00001215
WBGene00001219
WBGene00001225
WBGene00001226
WBGene00001227
WBGene00001258
WBGene00001259
WBGene00001262
WBGene00001303
WBGene00001338
WBGene00001390
WBGene00001394
WBGene00001411
WBGene00001423
WBGene00001426
WBGene00001498
WBGene00001501
WBGene00001513
WBGene00001518
WBGene00001580
WBGene00001584
WBGene00001585
WBGene00001617
WBGene00001745
WBGene00001776
WBGene00001791
WBGene00001793
WBGene00001794
WBGene00001808
WBGene00001813
WBGene00001834
WBGene00001937
WBGene00001955
WBGene00001972
WBGene00002025
WBGene00002029
WBGene00002064
WBGene00002065
WBGene00002066
WBGene00002068
WBGene00002071
WBGene00002073
WBGene00002074
WBGene00002075
WBGene00002078
WBGene00002147
WBGene00002162
WBGene00002180
WBGene00002202
WBGene00002229
WBGene00002250
WBGene00002335
WBGene00002998
WBGene00003002
WBGene00003003
WBGene00003014
WBGene00003020
WBGene00003030
WBGene00003034
WBGene00003036
WBGene00003038
WBGene00003046
WBGene00003062
WBGene00003080
WBGene00003086
WBGene00003148
WBGene00003149
WBGene00003159
WBGene00003161
WBGene00003162
WBGene00003182
WBGene00003183
WBGene00003196
WBGene00003234
WBGene00003241
WBGene00003374
WBGene00003406
WBGene00003407
WBGene00003475
WBGene00003478
WBGene00003568
WBGene00003576
WBGene00003600
WBGene00003624
WBGene00003630
WBGene00003632
WBGene00003637
WBGene00003638
WBGene00003639
WBGene00003661
WBGene00003695
WBGene00003785
WBGene00003789
WBGene00003793
WBGene00003794
WBGene00003800
WBGene00003826
WBGene00003858
WBGene00003868
WBGene00003902
WBGene00003903
WBGene00003904
WBGene00003911
WBGene00003915
WBGene00003924
WBGene00003947
WBGene00003953
WBGene00003955
WBGene00003975
WBGene00004015
WBGene00004037
WBGene00004046
WBGene00004085
WBGene00004105
WBGene00004111
WBGene00004117
WBGene00004138
WBGene00004147
WBGene00004150
WBGene00004166
WBGene00004167
WBGene00004187
WBGene00004214
WBGene00004222
WBGene00004248
WBGene00004254
WBGene00004258
WBGene00004273
WBGene00004277
WBGene00004306
WBGene00004314
WBGene00004315
WBGene00004317
WBGene00004320
WBGene00004321
WBGene00004326
WBGene00004338
WBGene00004375
WBGene00004410
WBGene00004414
WBGene00004420
WBGene00004423
WBGene00004424
WBGene00004425
WBGene00004427
WBGene00004432
WBGene00004433
WBGene00004434
WBGene00004435
WBGene00004437
WBGene00004442
WBGene00004444
WBGene00004445
WBGene00004446
WBGene00004447
WBGene00004449
WBGene00004452
WBGene00004461
WBGene00004464
WBGene00004468
WBGene00004471
WBGene00004473
WBGene00004474
WBGene00004478
WBGene00004480
WBGene00004482
WBGene00004484
WBGene00004486
WBGene00004488
WBGene00004489
WBGene00004490
WBGene00004492
WBGene00004495
WBGene00004501
WBGene00004506
WBGene00004700
WBGene00004702
WBGene00004703
WBGene00004727
WBGene00004737
WBGene00004743
WBGene00004758
WBGene00004781
WBGene00004801
WBGene00004825
WBGene00004879
WBGene00004888
WBGene00004891
WBGene00004893
WBGene00004897
WBGene00004916
WBGene00004917
WBGene00004918
WBGene00004919
WBGene00004980
WBGene00005007
WBGene00005310
WBGene00005648
WBGene00006307
WBGene00006393
WBGene00006395
WBGene00006396
WBGene00006431
WBGene00006432
WBGene00006442
WBGene00006479
WBGene00006481
WBGene00006513
WBGene00006520
WBGene00006528
WBGene00006529
WBGene00006594
WBGene00006595
WBGene00006613
WBGene00006704
WBGene00006713
WBGene00006728
WBGene00006749
WBGene00006757
WBGene00006772
WBGene00006776
WBGene00006797
WBGene00006798
WBGene00006802
WBGene00006840
WBGene00006888
WBGene00006947
WBGene00007000
WBGene00007007
WBGene00007008
WBGene00007028
WBGene00007047
WBGene00007053
WBGene00007056
WBGene00007119
WBGene00007168
WBGene00007175
WBGene00007184
WBGene00007192
WBGene00007213
WBGene00007235
WBGene00007237
WBGene00007267
WBGene00007330
WBGene00007348
WBGene00007350
WBGene00007429
WBGene00007529
WBGene00007647
WBGene00007684
WBGene00007710
WBGene00007712
WBGene00007713
WBGene00007761
WBGene00007772
WBGene00007784
WBGene00007855
WBGene00007878
WBGene00007911
WBGene00007921
WBGene00007923
WBGene00007924
WBGene00007952
WBGene00007953
WBGene00007976
WBGene00007993
WBGene00008052
WBGene00008081
WBGene00008117
WBGene00008136
WBGene00008218
WBGene00008224
WBGene00008259
WBGene00008338
WBGene00008341
WBGene00008392
WBGene00008419
WBGene00008422
WBGene00008436
WBGene00008488
WBGene00008512
WBGene00008528
WBGene00008586
WBGene00008587
WBGene00008687
WBGene00008706
WBGene00008708
WBGene00008766
WBGene00008805
WBGene00008857
WBGene00008860
WBGene00008882
WBGene00008920
WBGene00008921
WBGene00008924
WBGene00008976
WBGene00009008
WBGene00009127
WBGene00009138
WBGene00009162
WBGene00009164
WBGene00009179
WBGene00009180
WBGene00009182
WBGene00009211
WBGene00009219
WBGene00009264
WBGene00009284
WBGene00009286
WBGene00009314
WBGene00009365
WBGene00009448
WBGene00009454
WBGene00009469
WBGene00009513
WBGene00009521
WBGene00009542
WBGene00009583
WBGene00009650
WBGene00009674
WBGene00009677
WBGene00009801
WBGene00009804
WBGene00009829
WBGene00009851
WBGene00009881
WBGene00009915
WBGene00010006
WBGene00010012
WBGene00010028
WBGene00010038
WBGene00010044
WBGene00010045
WBGene00010052
WBGene00010075
WBGene00010077
WBGene00010097
WBGene00010130
WBGene00010199
WBGene00010284
WBGene00010409
WBGene00010425
WBGene00010427
WBGene00010465
WBGene00010629
WBGene00010665
WBGene00010678
WBGene00010685
WBGene00010687
WBGene00010725
WBGene00010785
WBGene00010794
WBGene00010807
WBGene00010841
WBGene00010846
WBGene00010847
WBGene00010896
WBGene00010912
WBGene00010913
WBGene00010941
WBGene00011050
WBGene00011156
WBGene00011198
WBGene00011268
WBGene00011329
WBGene00011349
WBGene00011352
WBGene00011475
WBGene00011481
WBGene00011484
WBGene00011488
WBGene00011498
WBGene00011529
WBGene00011531
WBGene00011558
WBGene00011580
WBGene00011614
WBGene00011615
WBGene00011680
WBGene00011696
WBGene00011729
WBGene00011730
WBGene00011737
WBGene00011802
WBGene00011827
WBGene00011834
WBGene00011838
WBGene00011850
WBGene00011885
WBGene00011907
WBGene00011908
WBGene00011976
WBGene00012000
WBGene00012166
WBGene00012167
WBGene00012179
WBGene00012198
WBGene00012203
WBGene00012206
WBGene00012234
WBGene00012337
WBGene00012343
WBGene00012351
WBGene00012353
WBGene00012354
WBGene00012361
WBGene00012496
WBGene00012528
WBGene00012532
WBGene00012550
WBGene00012553
WBGene00012558
WBGene00012663
WBGene00012675
WBGene00012696
WBGene00012698
WBGene00012718
WBGene00012762
WBGene00012768
WBGene00012769
WBGene00012829
WBGene00012830
WBGene00012850
WBGene00012897
WBGene00013004
WBGene00013038
WBGene00013055
WBGene00013106
WBGene00013128
WBGene00013196
WBGene00013213
WBGene00013216
WBGene00013219
WBGene00013308
WBGene00013324
WBGene00013347
WBGene00013461
WBGene00013563
WBGene00013568
WBGene00013569
WBGene00013604
WBGene00013716
WBGene00013725
WBGene00013737
WBGene00013765
WBGene00013766
WBGene00013789
WBGene00013845
WBGene00013862
WBGene00013870
WBGene00013877
WBGene00013897
WBGene00013899
WBGene00013917
WBGene00013924
WBGene00014036
WBGene00014054
WBGene00014067
WBGene00014096
WBGene00014115
WBGene00014177
WBGene00015008
WBGene00015011
WBGene00015023
WBGene00015115
WBGene00015156
WBGene00015160
WBGene00015205
WBGene00015300
WBGene00015327
WBGene00015328
WBGene00015391
WBGene00015463
WBGene00015488
WBGene00015581
WBGene00015750
WBGene00015755
WBGene00015811
WBGene00015955
WBGene00015964
WBGene00016002
WBGene00016015
WBGene00016018
WBGene00016045
WBGene00016138
WBGene00016201
WBGene00016244
WBGene00016245
WBGene00016258
WBGene00016261
WBGene00016289
WBGene00016313
WBGene00016332
WBGene00016342
WBGene00016415
WBGene00016421
WBGene00016493
WBGene00016494
WBGene00016507
WBGene00016580
WBGene00016651
WBGene00016653
WBGene00016678
WBGene00016794
WBGene00016811
WBGene00016902
WBGene00016905
WBGene00016978
WBGene00017070
WBGene00017071
WBGene00017075
WBGene00017098
WBGene00017119
WBGene00017178
WBGene00017195
WBGene00017269
WBGene00017310
WBGene00017311
WBGene00017317
WBGene00017321
WBGene00017342
WBGene00017349
WBGene00017372
WBGene00017431
WBGene00017434
WBGene00017435
WBGene00017467
WBGene00017534
WBGene00017605
WBGene00017606
WBGene00017608
WBGene00017638
WBGene00017642
WBGene00017643
WBGene00017702
WBGene00017769
WBGene00017782
WBGene00017826
WBGene00017829
WBGene00017898
WBGene00017925
WBGene00017929
WBGene00017967
WBGene00017982
WBGene00017984
WBGene00017988
WBGene00017989
WBGene00017993
WBGene00018008
WBGene00018075
WBGene00018076
WBGene00018161
WBGene00018164
WBGene00018179
WBGene00018226
WBGene00018242
WBGene00018268
WBGene00018269
WBGene00018285
WBGene00018290
WBGene00018293
WBGene00018304
WBGene00018341
WBGene00018351
WBGene00018490
WBGene00018508
WBGene00018599
WBGene00018612
WBGene00018615
WBGene00018679
WBGene00018756
WBGene00018794
WBGene00018830
WBGene00018846
WBGene00018932
WBGene00018953
WBGene00018956
WBGene00018967
WBGene00019001
WBGene00019060
WBGene00019158
WBGene00019162
WBGene00019246
WBGene00019282
WBGene00019284
WBGene00019351
WBGene00019427
WBGene00019456
WBGene00019537
WBGene00019767
WBGene00019808
WBGene00019824
WBGene00019847
WBGene00019872
WBGene00019881
WBGene00019937
WBGene00019946
WBGene00019953
WBGene00019983
WBGene00019986
WBGene00020002
WBGene00020003
WBGene00020022
WBGene00020026
WBGene00020097
WBGene00020184
WBGene00020193
WBGene00020220
WBGene00020286
WBGene00020298
WBGene00020389
WBGene00020466
WBGene00020507
WBGene00020510
WBGene00020511
WBGene00020533
WBGene00020556
WBGene00020572
WBGene00020596
WBGene00020612
WBGene00020629
WBGene00020633
WBGene00020653
WBGene00020687
WBGene00020779
WBGene00020796
WBGene00020806
WBGene00020864
WBGene00020899
WBGene00020915
WBGene00020994
WBGene00021024
WBGene00021026
WBGene00021088
WBGene00021202
WBGene00021248
WBGene00021285
WBGene00021311
WBGene00021366
WBGene00021441
WBGene00021468
WBGene00021506
WBGene00021551
WBGene00021552
WBGene00021564
WBGene00021595
WBGene00021636
WBGene00021702
WBGene00021733
WBGene00021749
WBGene00021815
WBGene00021841
WBGene00021845
WBGene00021888
WBGene00021912
WBGene00021929
WBGene00021934
WBGene00022015
WBGene00022019
WBGene00022047
WBGene00022048
WBGene00022060
WBGene00022069
WBGene00022123
WBGene00022127
WBGene00022139
WBGene00022153
WBGene00022168
WBGene00022185
WBGene00022235
WBGene00022301
WBGene00022310
WBGene00022368
WBGene00022369
WBGene00022376
WBGene00022396
WBGene00022466
WBGene00022489
WBGene00022493
WBGene00022502
WBGene00022666
WBGene00022678
WBGene00022719
WBGene00022752
WBGene00022774
WBGene00022788
WBGene00022797
WBGene00022800
WBGene00022868
WBGene00023487
WBGene00043064
WBGene00043297
WBGene00043994
WBGene00044143
WBGene00044989
WBGene00045249
WBGene00050899
WBGene00050944
WBGene00175027
WBGene00175029
WBGene00175035
WBGene00185117
WBGene00195047
WBGene00206376
WBGene00206384
WBGene00206419
WBGene00219209

## Sheet: 358 Zhong Stalled
WBGene00000063
WBGene00000066
WBGene00000084
WBGene00000094
WBGene00000115
WBGene00000116
WBGene00000151
WBGene00000207
WBGene00000210
WBGene00000224
WBGene00000247
WBGene00000262
WBGene00000264
WBGene00000286
WBGene00000293
WBGene00000371
WBGene00000377
WBGene00000408
WBGene00000459
WBGene00000533
WBGene00000549
WBGene00000599
WBGene00000601
WBGene00000602
WBGene00000669
WBGene00000717
WBGene00000733
WBGene00000739
WBGene00000740
WBGene00000763
WBGene00000892
WBGene00000941
WBGene00000983
WBGene00001005
WBGene00001026
WBGene00001073
WBGene00001082
WBGene00001167
WBGene00001168
WBGene00001169
WBGene00001196
WBGene00001214
WBGene00001309
WBGene00001386
WBGene00001390
WBGene00001498
WBGene00001617
WBGene00001683
WBGene00001745
WBGene00001753
WBGene00001756
WBGene00001757
WBGene00001776
WBGene00001874
WBGene00001913
WBGene00001935
WBGene00002027
WBGene00002065
WBGene00002068
WBGene00002077
WBGene00002162
WBGene00002177
WBGene00002198
WBGene00002224
WBGene00002344
WBGene00003038
WBGene00003048
WBGene00003080
WBGene00003241
WBGene00003370
WBGene00003388
WBGene00003495
WBGene00003552
WBGene00003583
WBGene00003639
WBGene00003825
WBGene00003836
WBGene00003858
WBGene00003947
WBGene00003978
WBGene00004034
WBGene00004056
WBGene00004059
WBGene00004116
WBGene00004132
WBGene00004185
WBGene00004187
WBGene00004245
WBGene00004267
WBGene00004276
WBGene00004340
WBGene00004412
WBGene00004414
WBGene00004418
WBGene00004421
WBGene00004423
WBGene00004424
WBGene00004425
WBGene00004427
WBGene00004432
WBGene00004434
WBGene00004445
WBGene00004460
WBGene00004470
WBGene00004473
WBGene00004482
WBGene00004489
WBGene00004699
WBGene00004703
WBGene00004917
WBGene00005530
WBGene00005835
WBGene00006059
WBGene00006239
WBGene00006307
WBGene00006319
WBGene00006385
WBGene00006466
WBGene00006510
WBGene00006571
WBGene00006580
WBGene00006699
WBGene00006700
WBGene00006704
WBGene00006727
WBGene00006755
WBGene00006833
WBGene00006888
WBGene00006917
WBGene00006921
WBGene00006924
WBGene00006947
WBGene00006964
WBGene00007009
WBGene00007259
WBGene00007352
WBGene00007464
WBGene00007630
WBGene00007666
WBGene00007681
WBGene00007688
WBGene00007811
WBGene00007882
WBGene00007883
WBGene00007909
WBGene00007954
WBGene00008143
WBGene00008144
WBGene00008272
WBGene00008274
WBGene00008288
WBGene00008411
WBGene00008444
WBGene00008512
WBGene00008544
WBGene00008572
WBGene00008651
WBGene00008708
WBGene00008768
WBGene00008913
WBGene00008918
WBGene00008920
WBGene00008980
WBGene00009112
WBGene00009119
WBGene00009127
WBGene00009374
WBGene00009551
WBGene00009580
WBGene00009584
WBGene00009587
WBGene00009595
WBGene00009643
WBGene00009691
WBGene00009692
WBGene00009728
WBGene00009750
WBGene00009771
WBGene00009801
WBGene00009851
WBGene00009909
WBGene00009920
WBGene00010052
WBGene00010053
WBGene00010063
WBGene00010117
WBGene00010199
WBGene00010233
WBGene00010260
WBGene00010337
WBGene00010419
WBGene00010420
WBGene00010440
WBGene00010597
WBGene00010730
WBGene00010842
WBGene00010846
WBGene00011035
WBGene00011123
WBGene00011218
WBGene00011222
WBGene00011292
WBGene00011299
WBGene00011475
WBGene00011660
WBGene00011788
WBGene00011798
WBGene00011832
WBGene00012179
WBGene00012192
WBGene00012253
WBGene00012273
WBGene00012457
WBGene00012459
WBGene00012528
WBGene00012553
WBGene00012615
WBGene00012648
WBGene00012717
WBGene00012767
WBGene00012774
WBGene00012825
WBGene00012840
WBGene00012920
WBGene00013055
WBGene00013080
WBGene00013094
WBGene00013107
WBGene00013160
WBGene00013181
WBGene00013224
WBGene00013556
WBGene00013568
WBGene00013569
WBGene00013573
WBGene00013647
WBGene00013734
WBGene00013878
WBGene00013919
WBGene00014004
WBGene00014027
WBGene00015355
WBGene00015410
WBGene00016041
WBGene00016048
WBGene00016061
WBGene00016121
WBGene00016158
WBGene00016249
WBGene00016378
WBGene00016408
WBGene00016499
WBGene00016508
WBGene00016540
WBGene00016568
WBGene00016575
WBGene00016602
WBGene00016729
WBGene00016893
WBGene00016964
WBGene00017084
WBGene00017087
WBGene00017136
WBGene00017162
WBGene00017219
WBGene00017220
WBGene00017273
WBGene00017311
WBGene00017545
WBGene00017678
WBGene00017680
WBGene00017702
WBGene00017726
WBGene00017833
WBGene00017852
WBGene00017892
WBGene00018145
WBGene00018164
WBGene00018293
WBGene00018564
WBGene00018585
WBGene00018674
WBGene00018750
WBGene00018846
WBGene00018953
WBGene00019097
WBGene00019243
WBGene00019284
WBGene00019324
WBGene00019462
WBGene00019612
WBGene00019668
WBGene00019719
WBGene00019759
WBGene00019787
WBGene00019872
WBGene00019888
WBGene00019892
WBGene00019946
WBGene00019947
WBGene00019953
WBGene00020038
WBGene00020075
WBGene00020114
WBGene00020200
WBGene00020334
WBGene00020346
WBGene00020381
WBGene00020390
WBGene00020391
WBGene00020425
WBGene00020445
WBGene00020453
WBGene00020507
WBGene00020577
WBGene00020824
WBGene00020827
WBGene00020854
WBGene00020886
WBGene00020894
WBGene00020942
WBGene00020946
WBGene00021026
WBGene00021047
WBGene00021048
WBGene00021068
WBGene00021100
WBGene00021104
WBGene00021202
WBGene00021419
WBGene00021538
WBGene00021595
WBGene00021596
WBGene00021629
WBGene00021837
WBGene00021956
WBGene00022114
WBGene00022126
WBGene00022169
WBGene00022170
WBGene00022185
WBGene00022235
WBGene00022378
WBGene00022401
WBGene00022456
WBGene00022598
WBGene00022677
WBGene00022748
WBGene00022860
WBGene00022865
WBGene00022868
WBGene00043297
WBGene00044265
WBGene00044433
WBGene00044533
WBGene00044609
WBGene00044699
WBGene00044761

## Sheet: 100 High Pol II
WBGene00006439
WBGene00003081
WBGene00013081
WBGene00019537
WBGene00019831
WBGene00001854
WBGene00012382
WBGene00002016
WBGene00003080
WBGene00003124
WBGene00011826
WBGene00001685
WBGene00021043
WBGene00001303
WBGene00011849
WBGene00001853
WBGene00004342
WBGene00020865
WBGene00013311
WBGene00001585
WBGene00018294
WBGene00022745
WBGene00010419
WBGene00004441
WBGene00022043
WBGene00007363
WBGene00013238
WBGene00010248
WBGene00012472
WBGene00018291
WBGene00043297
WBGene00012760
WBGene00004424
WBGene00019357
WBGene00009584
WBGene00013303
WBGene00010408
WBGene00011232
WBGene00011884
WBGene00009532
WBGene00004703
WBGene00006975
WBGene00007385
WBGene00013899
WBGene00003511
WBGene00016272
WBGene00010407
WBGene00013515
WBGene00017294
WBGene00019353
WBGene00000883
WBGene00006705
WBGene00022400
WBGene00018701
WBGene00004453
WBGene00015776
WBGene00013734
WBGene00000208
WBGene00001439
WBGene00000516
WBGene00022170
WBGene00022010
WBGene00017675
WBGene00000552
WBGene00010740
WBGene00022078
WBGene00016632
WBGene00000726
WBGene00000407
WBGene00001999
WBGene00018328
WBGene00021888
WBGene00000183
WBGene00007713
WBGene00020216
WBGene00018204
WBGene00000776
WBGene00010133
WBGene00019381
WBGene00020374
WBGene00010479
WBGene00008916
WBGene00020200
WBGene00012885
WBGene00017756
WBGene00014213
WBGene00000170
WBGene00011263
WBGene00009436
WBGene00004013
WBGene00019354
WBGene00007883
WBGene00012117
WBGene00006704
WBGene00004326
WBGene00013882
WBGene00011511
WBGene00017430
WBGene00009330
WBGene00009723

## Sheet: 1423 Fed Exp Up-Regulated
WBGene00000047
WBGene00000067
WBGene00000083
WBGene00000107
WBGene00000111
WBGene00000113
WBGene00000151
WBGene00000158
WBGene00000175
WBGene00000186
WBGene00000196
WBGene00000197
WBGene00000198
WBGene00000199
WBGene00000209
WBGene00000228
WBGene00000231
WBGene00000275
WBGene00000283
WBGene00000374
WBGene00000392
WBGene00000396
WBGene00000411
WBGene00000412
WBGene00000414
WBGene00000425
WBGene00000447
WBGene00000462
WBGene00000484
WBGene00000503
WBGene00000512
WBGene00000522
WBGene00000528
WBGene00000536
WBGene00000545
WBGene00000550
WBGene00000556
WBGene00000557
WBGene00000558
WBGene00000668
WBGene00000669
WBGene00000677
WBGene00000703
WBGene00000707
WBGene00000718
WBGene00000728
WBGene00000742
WBGene00000743
WBGene00000762
WBGene00000767
WBGene00000774
WBGene00000779
WBGene00000780
WBGene00000781
WBGene00000783
WBGene00000785
WBGene00000818
WBGene00000829
WBGene00000831
WBGene00000834
WBGene00000868
WBGene00000891
WBGene00000917
WBGene00000933
WBGene00000941
WBGene00000942
WBGene00000962
WBGene00000966
WBGene00000967
WBGene00000973
WBGene00000982
WBGene00000983
WBGene00000984
WBGene00000986
WBGene00000988
WBGene00001000
WBGene00001001
WBGene00001006
WBGene00001025
WBGene00001026
WBGene00001028
WBGene00001035
WBGene00001036
WBGene00001039
WBGene00001045
WBGene00001051
WBGene00001068
WBGene00001074
WBGene00001077
WBGene00001095
WBGene00001099
WBGene00001107
WBGene00001113
WBGene00001129
WBGene00001134
WBGene00001153
WBGene00001155
WBGene00001158
WBGene00001168
WBGene00001215
WBGene00001231
WBGene00001233
WBGene00001234
WBGene00001247
WBGene00001281
WBGene00001303
WBGene00001328
WBGene00001333
WBGene00001386
WBGene00001400
WBGene00001402
WBGene00001404
WBGene00001423
WBGene00001426
WBGene00001429
WBGene00001430
WBGene00001488
WBGene00001500
WBGene00001501
WBGene00001502
WBGene00001520
WBGene00001562
WBGene00001566
WBGene00001579
WBGene00001601
WBGene00001612
WBGene00001630
WBGene00001632
WBGene00001633
WBGene00001649
WBGene00001674
WBGene00001689
WBGene00001708
WBGene00001719
WBGene00001723
WBGene00001767
WBGene00001774
WBGene00001808
WBGene00001811
WBGene00001813
WBGene00001815
WBGene00001819
WBGene00001830
WBGene00001836
WBGene00001841
WBGene00001844
WBGene00001853
WBGene00001856
WBGene00001857
WBGene00001858
WBGene00001878
WBGene00001893
WBGene00001894
WBGene00001901
WBGene00001907
WBGene00001908
WBGene00001914
WBGene00001915
WBGene00001918
WBGene00001935
WBGene00001975
WBGene00001977
WBGene00001980
WBGene00001983
WBGene00002008
WBGene00002025
WBGene00002037
WBGene00002047
WBGene00002058
WBGene00002067
WBGene00002070
WBGene00002071
WBGene00002079
WBGene00002081
WBGene00002083
WBGene00002109
WBGene00002175
WBGene00002183
WBGene00002189
WBGene00002200
WBGene00002203
WBGene00002231
WBGene00002238
WBGene00002240
WBGene00002255
WBGene00002256
WBGene00002257
WBGene00002258
WBGene00002259
WBGene00002262
WBGene00002268
WBGene00002269
WBGene00002270
WBGene00002272
WBGene00002280
WBGene00002297
WBGene00002497
WBGene00002637
WBGene00002804
WBGene00002850
WBGene00002879
WBGene00002891
WBGene00002915
WBGene00002975
WBGene00002978
WBGene00002986
WBGene00002998
WBGene00003018
WBGene00003046
WBGene00003055
WBGene00003062
WBGene00003074
WBGene00003090
WBGene00003091
WBGene00003092
WBGene00003095
WBGene00003119
WBGene00003133
WBGene00003136
WBGene00003144
WBGene00003153
WBGene00003155
WBGene00003156
WBGene00003158
WBGene00003159
WBGene00003162
WBGene00003169
WBGene00003185
WBGene00003210
WBGene00003248
WBGene00003367
WBGene00003384
WBGene00003410
WBGene00003449
WBGene00003474
WBGene00003479
WBGene00003480
WBGene00003485
WBGene00003497
WBGene00003544
WBGene00003546
WBGene00003559
WBGene00003580
WBGene00003586
WBGene00003592
WBGene00003611
WBGene00003633
WBGene00003647
WBGene00003655
WBGene00003658
WBGene00003692
WBGene00003702
WBGene00003727
WBGene00003730
WBGene00003731
WBGene00003734
WBGene00003738
WBGene00003763
WBGene00003764
WBGene00003765
WBGene00003771
WBGene00003776
WBGene00003786
WBGene00003789
WBGene00003792
WBGene00003796
WBGene00003798
WBGene00003799
WBGene00003806
WBGene00003815
WBGene00003835
WBGene00003837
WBGene00003838
WBGene00003844
WBGene00003851
WBGene00003893
WBGene00003922
WBGene00003923
WBGene00003928
WBGene00003930
WBGene00003931
WBGene00003936
WBGene00003953
WBGene00003955
WBGene00003957
WBGene00003959
WBGene00003962
WBGene00003963
WBGene00003965
WBGene00003989
WBGene00003991
WBGene00003996
WBGene00003997
WBGene00004006
WBGene00004008
WBGene00004014
WBGene00004015
WBGene00004020
WBGene00004034
WBGene00004049
WBGene00004062
WBGene00004063
WBGene00004076
WBGene00004085
WBGene00004112
WBGene00004113
WBGene00004123
WBGene00004129
WBGene00004130
WBGene00004144
WBGene00004152
WBGene00004164
WBGene00004173
WBGene00004178
WBGene00004188
WBGene00004189
WBGene00004204
WBGene00004205
WBGene00004209
WBGene00004226
WBGene00004269
WBGene00004302
WBGene00004305
WBGene00004312
WBGene00004357
WBGene00004391
WBGene00004393
WBGene00004403
WBGene00004447
WBGene00004489
WBGene00004502
WBGene00004680
WBGene00004681
WBGene00004698
WBGene00004699
WBGene00004703
WBGene00004706
WBGene00004732
WBGene00004736
WBGene00004745
WBGene00004751
WBGene00004754
WBGene00004755
WBGene00004762
WBGene00004810
WBGene00004855
WBGene00004875
WBGene00004883
WBGene00004888
WBGene00004889
WBGene00004914
WBGene00004917
WBGene00004918
WBGene00004920
WBGene00004930
WBGene00004931
WBGene00004955
WBGene00004978
WBGene00004981
WBGene00004999
WBGene00005657
WBGene00005662
WBGene00006061
WBGene00006066
WBGene00006191
WBGene00006351
WBGene00006359
WBGene00006384
WBGene00006404
WBGene00006436
WBGene00006452
WBGene00006483
WBGene00006491
WBGene00006498
WBGene00006512
WBGene00006516
WBGene00006529
WBGene00006538
WBGene00006572
WBGene00006574
WBGene00006601
WBGene00006608
WBGene00006617
WBGene00006626
WBGene00006648
WBGene00006680
WBGene00006693
WBGene00006706
WBGene00006759
WBGene00006771
WBGene00006780
WBGene00006787
WBGene00006801
WBGene00006805
WBGene00006820
WBGene00006824
WBGene00006826
WBGene00006861
WBGene00006876
WBGene00006887
WBGene00006911
WBGene00006916
WBGene00006933
WBGene00006935
WBGene00006937
WBGene00006944
WBGene00006964
WBGene00007000
WBGene00007001
WBGene00007011
WBGene00007028
WBGene00007050
WBGene00007087
WBGene00007101
WBGene00007106
WBGene00007108
WBGene00007128
WBGene00007129
WBGene00007130
WBGene00007139
WBGene00007142
WBGene00007150
WBGene00007185
WBGene00007187
WBGene00007194
WBGene00007195
WBGene00007201
WBGene00007207
WBGene00007210
WBGene00007215
WBGene00007233
WBGene00007245
WBGene00007247
WBGene00007258
WBGene00007297
WBGene00007303
WBGene00007321
WBGene00007331
WBGene00007352
WBGene00007362
WBGene00007372
WBGene00007384
WBGene00007393
WBGene00007405
WBGene00007422
WBGene00007444
WBGene00007448
WBGene00007455
WBGene00007463
WBGene00007464
WBGene00007507
WBGene00007531
WBGene00007564
WBGene00007565
WBGene00007578
WBGene00007583
WBGene00007605
WBGene00007615
WBGene00007669
WBGene00007686
WBGene00007697
WBGene00007698
WBGene00007712
WBGene00007729
WBGene00007797
WBGene00007825
WBGene00007854
WBGene00007864
WBGene00007886
WBGene00007916
WBGene00007926
WBGene00007927
WBGene00007929
WBGene00007932
WBGene00007957
WBGene00007966
WBGene00007978
WBGene00007994
WBGene00008003
WBGene00008019
WBGene00008028
WBGene00008032
WBGene00008035
WBGene00008110
WBGene00008132
WBGene00008148
WBGene00008149
WBGene00008215
WBGene00008237
WBGene00008248
WBGene00008287
WBGene00008361
WBGene00008375
WBGene00008400
WBGene00008415
WBGene00008430
WBGene00008447
WBGene00008458
WBGene00008504
WBGene00008506
WBGene00008510
WBGene00008514
WBGene00008515
WBGene00008538
WBGene00008549
WBGene00008558
WBGene00008566
WBGene00008575
WBGene00008584
WBGene00008588
WBGene00008595
WBGene00008647
WBGene00008670
WBGene00008683
WBGene00008684
WBGene00008720
WBGene00008764
WBGene00008781
WBGene00008848
WBGene00008851
WBGene00008860
WBGene00008862
WBGene00008897
WBGene00008929
WBGene00008988
WBGene00008993
WBGene00009007
WBGene00009023
WBGene00009048
WBGene00009082
WBGene00009084
WBGene00009113
WBGene00009132
WBGene00009141
WBGene00009158
WBGene00009163
WBGene00009189
WBGene00009201
WBGene00009207
WBGene00009211
WBGene00009220
WBGene00009228
WBGene00009237
WBGene00009245
WBGene00009246
WBGene00009254
WBGene00009256
WBGene00009270
WBGene00009293
WBGene00009319
WBGene00009330
WBGene00009342
WBGene00009352
WBGene00009353
WBGene00009366
WBGene00009367
WBGene00009368
WBGene00009370
WBGene00009395
WBGene00009419
WBGene00009429
WBGene00009430
WBGene00009433
WBGene00009444
WBGene00009507
WBGene00009514
WBGene00009531
WBGene00009533
WBGene00009624
WBGene00009626
WBGene00009637
WBGene00009661
WBGene00009674
WBGene00009706
WBGene00009731
WBGene00009732
WBGene00009787
WBGene00009814
WBGene00009829
WBGene00009838
WBGene00009877
WBGene00009880
WBGene00009888
WBGene00009895
WBGene00009918
WBGene00009925
WBGene00009944
WBGene00009952
WBGene00009981
WBGene00009984
WBGene00009992
WBGene00010001
WBGene00010015
WBGene00010032
WBGene00010040
WBGene00010042
WBGene00010075
WBGene00010094
WBGene00010123
WBGene00010135
WBGene00010139
WBGene00010177
WBGene00010197
WBGene00010202
WBGene00010204
WBGene00010266
WBGene00010303
WBGene00010316
WBGene00010317
WBGene00010321
WBGene00010336
WBGene00010351
WBGene00010362
WBGene00010383
WBGene00010405
WBGene00010407
WBGene00010437
WBGene00010440
WBGene00010478
WBGene00010488
WBGene00010496
WBGene00010502
WBGene00010505
WBGene00010512
WBGene00010515
WBGene00010523
WBGene00010539
WBGene00010557
WBGene00010567
WBGene00010569
WBGene00010582
WBGene00010593
WBGene00010605
WBGene00010610
WBGene00010616
WBGene00010627
WBGene00010645
WBGene00010646
WBGene00010658
WBGene00010659
WBGene00010660
WBGene00010667
WBGene00010670
WBGene00010685
WBGene00010703
WBGene00010704
WBGene00010705
WBGene00010713
WBGene00010721
WBGene00010732
WBGene00010746
WBGene00010749
WBGene00010759
WBGene00010778
WBGene00010785
WBGene00010793
WBGene00010812
WBGene00010839
WBGene00010846
WBGene00010877
WBGene00010896
WBGene00010899
WBGene00010901
WBGene00010924
WBGene00010951
WBGene00010988
WBGene00011003
WBGene00011015
WBGene00011017
WBGene00011029
WBGene00011033
WBGene00011034
WBGene00011037
WBGene00011038
WBGene00011043
WBGene00011059
WBGene00011064
WBGene00011071
WBGene00011076
WBGene00011094
WBGene00011095
WBGene00011106
WBGene00011110
WBGene00011139
WBGene00011181
WBGene00011182
WBGene00011190
WBGene00011224
WBGene00011247
WBGene00011272
WBGene00011306
WBGene00011333
WBGene00011334
WBGene00011338
WBGene00011348
WBGene00011353
WBGene00011391
WBGene00011407
WBGene00011408
WBGene00011412
WBGene00011417
WBGene00011419
WBGene00011450
WBGene00011474
WBGene00011481
WBGene00011488
WBGene00011510
WBGene00011526
WBGene00011532
WBGene00011564
WBGene00011592
WBGene00011634
WBGene00011635
WBGene00011638
WBGene00011648
WBGene00011664
WBGene00011668
WBGene00011672
WBGene00011679
WBGene00011696
WBGene00011707
WBGene00011713
WBGene00011720
WBGene00011729
WBGene00011738
WBGene00011771
WBGene00011775
WBGene00011803
WBGene00011805
WBGene00011814
WBGene00011819
WBGene00011821
WBGene00011829
WBGene00011838
WBGene00011841
WBGene00011856
WBGene00011870
WBGene00011904
WBGene00011906
WBGene00011930
WBGene00011934
WBGene00011935
WBGene00011938
WBGene00011977
WBGene00012015
WBGene00012018
WBGene00012070
WBGene00012085
WBGene00012094
WBGene00012105
WBGene00012106
WBGene00012123
WBGene00012126
WBGene00012166
WBGene00012192
WBGene00012222
WBGene00012251
WBGene00012279
WBGene00012323
WBGene00012324
WBGene00012342
WBGene00012344
WBGene00012361
WBGene00012369
WBGene00012386
WBGene00012404
WBGene00012434
WBGene00012445
WBGene00012458
WBGene00012489
WBGene00012491
WBGene00012518
WBGene00012531
WBGene00012535
WBGene00012583
WBGene00012588
WBGene00012602
WBGene00012606
WBGene00012615
WBGene00012657
WBGene00012658
WBGene00012664
WBGene00012697
WBGene00012704
WBGene00012714
WBGene00012715
WBGene00012766
WBGene00012778
WBGene00012788
WBGene00012810
WBGene00012830
WBGene00012886
WBGene00012896
WBGene00012909
WBGene00012923
WBGene00012932
WBGene00012964
WBGene00012984
WBGene00012992
WBGene00012997
WBGene00012999
WBGene00013018
WBGene00013034
WBGene00013037
WBGene00013127
WBGene00013143
WBGene00013189
WBGene00013237
WBGene00013238
WBGene00013263
WBGene00013275
WBGene00013311
WBGene00013312
WBGene00013345
WBGene00013361
WBGene00013406
WBGene00013422
WBGene00013435
WBGene00013438
WBGene00013458
WBGene00013464
WBGene00013477
WBGene00013522
WBGene00013531
WBGene00013544
WBGene00013557
WBGene00013558
WBGene00013559
WBGene00013576
WBGene00013578
WBGene00013591
WBGene00013606
WBGene00013632
WBGene00013636
WBGene00013658
WBGene00013668
WBGene00013671
WBGene00013680
WBGene00013681
WBGene00013691
WBGene00013702
WBGene00013704
WBGene00013720
WBGene00013729
WBGene00013738
WBGene00013740
WBGene00013765
WBGene00013804
WBGene00013805
WBGene00013872
WBGene00013884
WBGene00013903
WBGene00013950
WBGene00013958
WBGene00013969
WBGene00013997
WBGene00014022
WBGene00014077
WBGene00014081
WBGene00014088
WBGene00014136
WBGene00014173
WBGene00014202
WBGene00014224
WBGene00014249
WBGene00014307
WBGene00014666
WBGene00014667
WBGene00014759
WBGene00014761
WBGene00014772
WBGene00015017
WBGene00015050
WBGene00015099
WBGene00015105
WBGene00015116
WBGene00015117
WBGene00015131
WBGene00015133
WBGene00015137
WBGene00015168
WBGene00015186
WBGene00015205
WBGene00015216
WBGene00015258
WBGene00015282
WBGene00015297
WBGene00015322
WBGene00015344
WBGene00015349
WBGene00015356
WBGene00015389
WBGene00015391
WBGene00015399
WBGene00015400
WBGene00015413
WBGene00015433
WBGene00015434
WBGene00015464
WBGene00015469
WBGene00015483
WBGene00015514
WBGene00015525
WBGene00015548
WBGene00015599
WBGene00015605
WBGene00015621
WBGene00015643
WBGene00015647
WBGene00015660
WBGene00015695
WBGene00015702
WBGene00015713
WBGene00015729
WBGene00015752
WBGene00015754
WBGene00015791
WBGene00015794
WBGene00015815
WBGene00015889
WBGene00015915
WBGene00015930
WBGene00015933
WBGene00015949
WBGene00015954
WBGene00015971
WBGene00016004
WBGene00016017
WBGene00016027
WBGene00016028
WBGene00016030
WBGene00016046
WBGene00016052
WBGene00016057
WBGene00016064
WBGene00016066
WBGene00016112
WBGene00016129
WBGene00016144
WBGene00016180
WBGene00016202
WBGene00016221
WBGene00016266
WBGene00016283
WBGene00016295
WBGene00016316
WBGene00016333
WBGene00016340
WBGene00016374
WBGene00016390
WBGene00016391
WBGene00016392
WBGene00016395
WBGene00016412
WBGene00016419
WBGene00016424
WBGene00016425
WBGene00016442
WBGene00016444
WBGene00016493
WBGene00016524
WBGene00016582
WBGene00016583
WBGene00016594
WBGene00016607
WBGene00016609
WBGene00016616
WBGene00016653
WBGene00016655
WBGene00016674
WBGene00016676
WBGene00016693
WBGene00016722
WBGene00016746
WBGene00016749
WBGene00016750
WBGene00016769
WBGene00016817
WBGene00016844
WBGene00016845
WBGene00016860
WBGene00016879
WBGene00016906
WBGene00016912
WBGene00016913
WBGene00016918
WBGene00016943
WBGene00016958
WBGene00016965
WBGene00016983
WBGene00016995
WBGene00017005
WBGene00017012
WBGene00017031
WBGene00017065
WBGene00017071
WBGene00017077
WBGene00017082
WBGene00017085
WBGene00017098
WBGene00017108
WBGene00017119
WBGene00017126
WBGene00017149
WBGene00017162
WBGene00017169
WBGene00017217
WBGene00017244
WBGene00017245
WBGene00017312
WBGene00017313
WBGene00017319
WBGene00017356
WBGene00017431
WBGene00017437
WBGene00017439
WBGene00017463
WBGene00017464
WBGene00017484
WBGene00017488
WBGene00017490
WBGene00017499
WBGene00017501
WBGene00017506
WBGene00017510
WBGene00017514
WBGene00017571
WBGene00017591
WBGene00017592
WBGene00017618
WBGene00017627
WBGene00017657
WBGene00017691
WBGene00017719
WBGene00017756
WBGene00017757
WBGene00017760
WBGene00017763
WBGene00017766
WBGene00017787
WBGene00017799
WBGene00017804
WBGene00017806
WBGene00017827
WBGene00017855
WBGene00017864
WBGene00017880
WBGene00017882
WBGene00017887
WBGene00017889
WBGene00017892
WBGene00017907
WBGene00017924
WBGene00017968
WBGene00017969
WBGene00017973
WBGene00017981
WBGene00017982
WBGene00017984
WBGene00018014
WBGene00018015
WBGene00018017
WBGene00018046
WBGene00018050
WBGene00018138
WBGene00018145
WBGene00018151
WBGene00018159
WBGene00018174
WBGene00018187
WBGene00018213
WBGene00018218
WBGene00018221
WBGene00018230
WBGene00018240
WBGene00018262
WBGene00018271
WBGene00018286
WBGene00018325
WBGene00018341
WBGene00018362
WBGene00018367
WBGene00018375
WBGene00018406
WBGene00018407
WBGene00018448
WBGene00018451
WBGene00018456
WBGene00018460
WBGene00018513
WBGene00018576
WBGene00018590
WBGene00018602
WBGene00018604
WBGene00018615
WBGene00018625
WBGene00018643
WBGene00018656
WBGene00018682
WBGene00018689
WBGene00018701
WBGene00018702
WBGene00018720
WBGene00018723
WBGene00018725
WBGene00018732
WBGene00018769
WBGene00018776
WBGene00018823
WBGene00018849
WBGene00018853
WBGene00018860
WBGene00018863
WBGene00018866
WBGene00018885
WBGene00018893
WBGene00018900
WBGene00018903
WBGene00018904
WBGene00018909
WBGene00018910
WBGene00018948
WBGene00018951
WBGene00018961
WBGene00018969
WBGene00018992
WBGene00018997
WBGene00019003
WBGene00019017
WBGene00019076
WBGene00019078
WBGene00019090
WBGene00019103
WBGene00019104
WBGene00019105
WBGene00019145
WBGene00019146
WBGene00019160
WBGene00019209
WBGene00019273
WBGene00019282
WBGene00019311
WBGene00019345
WBGene00019355
WBGene00019373
WBGene00019380
WBGene00019401
WBGene00019407
WBGene00019433
WBGene00019435
WBGene00019439
WBGene00019470
WBGene00019471
WBGene00019472
WBGene00019473
WBGene00019477
WBGene00019489
WBGene00019509
WBGene00019522
WBGene00019565
WBGene00019617
WBGene00019628
WBGene00019645
WBGene00019647
WBGene00019656
WBGene00019658
WBGene00019660
WBGene00019661
WBGene00019680
WBGene00019717
WBGene00019727
WBGene00019760
WBGene00019770
WBGene00019778
WBGene00019803
WBGene00019829
WBGene00019875
WBGene00019883
WBGene00019890
WBGene00019895
WBGene00019924
WBGene00019931
WBGene00019962
WBGene00019967
WBGene00019973
WBGene00019987
WBGene00020047
WBGene00020049
WBGene00020054
WBGene00020068
WBGene00020089
WBGene00020099
WBGene00020102
WBGene00020128
WBGene00020139
WBGene00020164
WBGene00020169
WBGene00020181
WBGene00020185
WBGene00020195
WBGene00020207
WBGene00020236
WBGene00020241
WBGene00020247
WBGene00020248
WBGene00020274
WBGene00020311
WBGene00020329
WBGene00020340
WBGene00020343
WBGene00020347
WBGene00020379
WBGene00020383
WBGene00020408
WBGene00020425
WBGene00020437
WBGene00020463
WBGene00020471
WBGene00020479
WBGene00020498
WBGene00020499
WBGene00020516
WBGene00020517
WBGene00020576
WBGene00020587
WBGene00020593
WBGene00020600
WBGene00020604
WBGene00020636
WBGene00020672
WBGene00020696
WBGene00020700
WBGene00020703
WBGene00020716
WBGene00020717
WBGene00020732
WBGene00020742
WBGene00020765
WBGene00020788
WBGene00020808
WBGene00020812
WBGene00020823
WBGene00020836
WBGene00020839
WBGene00020869
WBGene00020878
WBGene00020881
WBGene00020883
WBGene00020884
WBGene00020886
WBGene00020902
WBGene00020915
WBGene00020936
WBGene00020997
WBGene00021009
WBGene00021024
WBGene00021032
WBGene00021034
WBGene00021043
WBGene00021057
WBGene00021058
WBGene00021070
WBGene00021088
WBGene00021109
WBGene00021128
WBGene00021133
WBGene00021148
WBGene00021156
WBGene00021160
WBGene00021170
WBGene00021215
WBGene00021220
WBGene00021248
WBGene00021276
WBGene00021281
WBGene00021292
WBGene00021315
WBGene00021327
WBGene00021335
WBGene00021347
WBGene00021348
WBGene00021367
WBGene00021415
WBGene00021420
WBGene00021425
WBGene00021427
WBGene00021440
WBGene00021441
WBGene00021448
WBGene00021464
WBGene00021470
WBGene00021475
WBGene00021476
WBGene00021494
WBGene00021507
WBGene00021518
WBGene00021519
WBGene00021538
WBGene00021555
WBGene00021558
WBGene00021580
WBGene00021583
WBGene00021595
WBGene00021638
WBGene00021660
WBGene00021697
WBGene00021725
WBGene00021743
WBGene00021757
WBGene00021768
WBGene00021784
WBGene00021789
WBGene00021808
WBGene00021818
WBGene00021844
WBGene00021846
WBGene00021849
WBGene00021863
WBGene00021868
WBGene00021870
WBGene00021879
WBGene00021920
WBGene00021928
WBGene00021932
WBGene00021938
WBGene00021943
WBGene00021952
WBGene00021959
WBGene00022022
WBGene00022044
WBGene00022069
WBGene00022087
WBGene00022089
WBGene00022113
WBGene00022119
WBGene00022122
WBGene00022125
WBGene00022126
WBGene00022127
WBGene00022148
WBGene00022159
WBGene00022176
WBGene00022180
WBGene00022199
WBGene00022222
WBGene00022235
WBGene00022236
WBGene00022259
WBGene00022261
WBGene00022314
WBGene00022350
WBGene00022373
WBGene00022383
WBGene00022413
WBGene00022425
WBGene00022435
WBGene00022471
WBGene00022482
WBGene00022492
WBGene00022584
WBGene00022609
WBGene00022629
WBGene00022645
WBGene00022664
WBGene00022665
WBGene00022668
WBGene00022670
WBGene00022672
WBGene00022702
WBGene00022731
WBGene00022734
WBGene00022743
WBGene00022765
WBGene00022766
WBGene00022772
WBGene00022783
WBGene00022793
WBGene00022794
WBGene00022801
WBGene00022808
WBGene00022834
WBGene00022851
WBGene00022854
WBGene00022861
WBGene00022865
WBGene00023405
WBGene00044001
WBGene00044026
WBGene00044067
WBGene00044068
WBGene00044083
WBGene00044094
WBGene00044323
WBGene00044324
WBGene00044338
WBGene00044357
WBGene00044642
WBGene00044658
WBGene00044794
WBGene00044811
WBGene00045379
WBGene00045433
WBGene00050937
WBGene00077658
WBGene00077701
WBGene00077714
WBGene00138720
WBGene00164974
WBGene00185001
WBGene00194667
WBGene00200527
WBGene00219274
WBGene00219451

## Sheet: 284 Starved Exp Up-Regulated
WBGene00000013
WBGene00000033
WBGene00000035
WBGene00000039
WBGene00000161
WBGene00000200
WBGene00000247
WBGene00000406
WBGene00000417
WBGene00000523
WBGene00000551
WBGene00000616
WBGene00000955
WBGene00001159
WBGene00001210
WBGene00001250
WBGene00001730
WBGene00001751
WBGene00001804
WBGene00001938
WBGene00001960
WBGene00002013
WBGene00002072
WBGene00002176
WBGene00002196
WBGene00002217
WBGene00002226
WBGene00002233
WBGene00002263
WBGene00003504
WBGene00003572
WBGene00003593
WBGene00003601
WBGene00003617
WBGene00003678
WBGene00003693
WBGene00003856
WBGene00003858
WBGene00003865
WBGene00003891
WBGene00003961
WBGene00004033
WBGene00004145
WBGene00004219
WBGene00004272
WBGene00004358
WBGene00004383
WBGene00004878
WBGene00004886
WBGene00004991
WBGene00004993
WBGene00005204
WBGene00005245
WBGene00005246
WBGene00005262
WBGene00005263
WBGene00005269
WBGene00005285
WBGene00005447
WBGene00005468
WBGene00005510
WBGene00005640
WBGene00005730
WBGene00005787
WBGene00005888
WBGene00005911
WBGene00006206
WBGene00006496
WBGene00006526
WBGene00006611
WBGene00006660
WBGene00006701
WBGene00006779
WBGene00006804
WBGene00006825
WBGene00006955
WBGene00007036
WBGene00007159
WBGene00007285
WBGene00007375
WBGene00007420
WBGene00007456
WBGene00007469
WBGene00007592
WBGene00007599
WBGene00007606
WBGene00007628
WBGene00007655
WBGene00007773
WBGene00007807
WBGene00007811
WBGene00007813
WBGene00008098
WBGene00008139
WBGene00008211
WBGene00008214
WBGene00008229
WBGene00008304
WBGene00008371
WBGene00008426
WBGene00008581
WBGene00008591
WBGene00008592
WBGene00008677
WBGene00008706
WBGene00008746
WBGene00008832
WBGene00008859
WBGene00009192
WBGene00009221
WBGene00009226
WBGene00009291
WBGene00009393
WBGene00009446
WBGene00009457
WBGene00009476
WBGene00009600
WBGene00009618
WBGene00009635
WBGene00009663
WBGene00009809
WBGene00009921
WBGene00009934
WBGene00009955
WBGene00009963
WBGene00009996
WBGene00010132
WBGene00010141
WBGene00010150
WBGene00010450
WBGene00010484
WBGene00010492
WBGene00010508
WBGene00010528
WBGene00010647
WBGene00010648
WBGene00010945
WBGene00010972
WBGene00011024
WBGene00011157
WBGene00011254
WBGene00011423
WBGene00011522
WBGene00011531
WBGene00011579
WBGene00011681
WBGene00011720
WBGene00011723
WBGene00011823
WBGene00012007
WBGene00012186
WBGene00012307
WBGene00012317
WBGene00012443
WBGene00012590
WBGene00012591
WBGene00012592
WBGene00012593
WBGene00012594
WBGene00012794
WBGene00012924
WBGene00013233
WBGene00013244
WBGene00013303
WBGene00013627
WBGene00013640
WBGene00013708
WBGene00013777
WBGene00014025
WBGene00014054
WBGene00014162
WBGene00014164
WBGene00014165
WBGene00014245
WBGene00015001
WBGene00015052
WBGene00015178
WBGene00015327
WBGene00015339
WBGene00015402
WBGene00015409
WBGene00015476
WBGene00015559
WBGene00015626
WBGene00015633
WBGene00015814
WBGene00015864
WBGene00015894
WBGene00015918
WBGene00015993
WBGene00016003
WBGene00016078
WBGene00016093
WBGene00016119
WBGene00016156
WBGene00016225
WBGene00016234
WBGene00016431
WBGene00016530
WBGene00016532
WBGene00016542
WBGene00016549
WBGene00016610
WBGene00016621
WBGene00016756
WBGene00016766
WBGene00016923
WBGene00016939
WBGene00017034
WBGene00017102
WBGene00017113
WBGene00017258
WBGene00017267
WBGene00017272
WBGene00017395
WBGene00017427
WBGene00017595
WBGene00017694
WBGene00017717
WBGene00017789
WBGene00018036
WBGene00018232
WBGene00018374
WBGene00018384
WBGene00018480
WBGene00018696
WBGene00018850
WBGene00018859
WBGene00018988
WBGene00019300
WBGene00019421
WBGene00019426
WBGene00019612
WBGene00019618
WBGene00019629
WBGene00019780
WBGene00019870
WBGene00019875
WBGene00019992
WBGene00020080
WBGene00020163
WBGene00020242
WBGene00020261
WBGene00020373
WBGene00020375
WBGene00020386
WBGene00020455
WBGene00020543
WBGene00020658
WBGene00020714
WBGene00020737
WBGene00020769
WBGene00020857
WBGene00020919
WBGene00020966
WBGene00020995
WBGene00021089
WBGene00021135
WBGene00021167
WBGene00021253
WBGene00021267
WBGene00021278
WBGene00021316
WBGene00021545
WBGene00021625
WBGene00021654
WBGene00021843
WBGene00022065
WBGene00022108
WBGene00022200
WBGene00022205
WBGene00022439
WBGene00022551
WBGene00022553
WBGene00022669
WBGene00022679
WBGene00022816
WBGene00023163
WBGene00023330
WBGene00023472
WBGene00044078
WBGene00044728
WBGene00045383
WBGene00045386

## Sheet: Delta O-GlcNAc Top 100
WBGene00000196
WBGene00000459
WBGene00001145
WBGene00001502
WBGene00001562
WBGene00001684
WBGene00001708
WBGene00001745
WBGene00001858
WBGene00001898
WBGene00001971
WBGene00001972
WBGene00002007
WBGene00002065
WBGene00002210
WBGene00003040
WBGene00003163
WBGene00003370
WBGene00003371
WBGene00003374
WBGene00003495
WBGene00003825
WBGene00003963
WBGene00004121
WBGene00004126
WBGene00004136
WBGene00004147
WBGene00004245
WBGene00004349
WBGene00004363
WBGene00004414
WBGene00004432
WBGene00004449
WBGene00004951
WBGene00006369
WBGene00006460
WBGene00006702
WBGene00006720
WBGene00006808
WBGene00006836
WBGene00006839
WBGene00007030
WBGene00007047
WBGene00007352
WBGene00007405
WBGene00007646
WBGene00007837
WBGene00008145
WBGene00008206
WBGene00008412
WBGene00008549
WBGene00008920
WBGene00008921
WBGene00009119
WBGene00009587
WBGene00009588
WBGene00010199
WBGene00010337
WBGene00010421
WBGene00010879
WBGene00011276
WBGene00011323
WBGene00011676
WBGene00011864
WBGene00011920
WBGene00011977
WBGene00012717
WBGene00012825
WBGene00013356
WBGene00013860
WBGene00015441
WBGene00015978
WBGene00016603
WBGene00017423
WBGene00017643
WBGene00017702
WBGene00017826
WBGene00017898
WBGene00018187
WBGene00018491
WBGene00018834
WBGene00019317
WBGene00019327
WBGene00019947
WBGene00019953
WBGene00019954
WBGene00020020
WBGene00020050
WBGene00020085
WBGene00020315
WBGene00020923
WBGene00020930
WBGene00021202
WBGene00021328
WBGene00021629
WBGene00021803
WBGene00021890
WBGene00022139
WBGene00022386
WBGene00022798

## Sheet: Delta O-GlcNAc Middle 100
WBGene00000910
WBGene00000958
WBGene00001008
WBGene00001086
WBGene00001178
WBGene00001329
WBGene00001747
WBGene00001748
WBGene00002344
WBGene00002363
WBGene00002583
WBGene00003209
WBGene00003368
WBGene00003476
WBGene00003597
WBGene00003598
WBGene00003613
WBGene00003630
WBGene00003632
WBGene00003697
WBGene00003904
WBGene00003915
WBGene00003948
WBGene00004116
WBGene00004152
WBGene00004342
WBGene00004441
WBGene00004457
WBGene00004474
WBGene00004506
WBGene00004909
WBGene00004949
WBGene00006351
WBGene00006352
WBGene00006594
WBGene00006608
WBGene00006772
WBGene00006778
WBGene00006796
WBGene00006863
WBGene00007175
WBGene00007492
WBGene00007882
WBGene00008143
WBGene00008745
WBGene00008919
WBGene00008922
WBGene00008940
WBGene00009126
WBGene00009580
WBGene00009589
WBGene00010427
WBGene00010480
WBGene00010796
WBGene00010919
WBGene00011097
WBGene00011352
WBGene00011440
WBGene00011737
WBGene00011849
WBGene00012031
WBGene00012137
WBGene00015007
WBGene00015163
WBGene00015552
WBGene00016017
WBGene00016201
WBGene00016378
WBGene00016384
WBGene00016421
WBGene00016562
WBGene00016609
WBGene00016997
WBGene00017171
WBGene00017220
WBGene00017675
WBGene00017699
WBGene00017914
WBGene00017915
WBGene00018291
WBGene00018400
WBGene00018465
WBGene00018564
WBGene00018598
WBGene00018615
WBGene00018756
WBGene00019209
WBGene00019329
WBGene00019612
WBGene00020092
WBGene00020619
WBGene00020947
WBGene00022373
WBGene00022396
WBGene00022473
WBGene00022500
WBGene00022639
WBGene00022750
WBGene00022887
WBGene00023405

## Sheet: Delta O-GlcNAc Bottom 100
WBGene00000430
WBGene00000789
WBGene00000915
WBGene00000938
WBGene00001398
WBGene00001558
WBGene00001577
WBGene00001602
WBGene00001966
WBGene00002015
WBGene00002016
WBGene00002018
WBGene00002020
WBGene00002045
WBGene00002207
WBGene00002263
WBGene00003009
WBGene00003149
WBGene00003237
WBGene00003602
WBGene00003618
WBGene00003653
WBGene00003858
WBGene00004088
WBGene00004271
WBGene00005026
WBGene00005183
WBGene00005228
WBGene00006402
WBGene00006527
WBGene00006840
WBGene00006996
WBGene00007044
WBGene00007270
WBGene00007365
WBGene00007366
WBGene00007476
WBGene00007878
WBGene00008205
WBGene00008436
WBGene00008439
WBGene00008488
WBGene00008857
WBGene00008925
WBGene00009142
WBGene00009691
WBGene00009692
WBGene00009772
WBGene00009974
WBGene00009975
WBGene00010273
WBGene00010790
WBGene00010867
WBGene00010999
WBGene00011027
WBGene00011119
WBGene00011291
WBGene00011292
WBGene00011300
WBGene00011304
WBGene00011564
WBGene00012107
WBGene00012113
WBGene00012591
WBGene00012593
WBGene00012700
WBGene00012929
WBGene00013303
WBGene00014004
WBGene00014013
WBGene00014058
WBGene00015251
WBGene00015277
WBGene00015350
WBGene00015484
WBGene00016041
WBGene00016111
WBGene00016119
WBGene00016121
WBGene00016173
WBGene00016893
WBGene00016961
WBGene00017303
WBGene00017422
WBGene00017789
WBGene00017964
WBGene00018070
WBGene00018490
WBGene00018750
WBGene00019185
WBGene00019572
WBGene00019831
WBGene00020362
WBGene00020363
WBGene00021469
WBGene00021643
WBGene00022098
WBGene00022233
WBGene00022668
WBGene00022748
