# Supplementary material for: Nutrient-Driven O-GlcNAcylation at Promoters Impacts Genome-Wide RNA Pol II Distribution
Source: Front Endocrinol (Lausanne). 2018 Sep 10;9:521. doi: 10.3389/fendo.2018.00521 (PMC6139338; doi:10.3389/fendo.2018.00521)
Supplement: Supplementary file 2 [file Table_2.XLSX]

## Sheet: Dereg in ogt-1 vs N2 Fed
Supplementary Table 2: Transcriptionally deregulated gene lists. Gene that were transcriptionally deregulated when comparing wild type and mutant animals in pair-wise combinations and under either starved or fed conditions are listed. For each list, an associated tab has the enrichment output using DAVID Bioinformatic Resources 6.8 (Huang da et al. 2009a; Huang da et al. 2009b).
ID	Gene Name	Species	GOTERM_BP_DIRECT	GOTERM_CC_DIRECT	GOTERM_MF_DIRECT	INTERPRO	KEGG_PATHWAY	SMART	UP_KEYWORDS	UP_SEQ_FEATURE
clec-3	C-type LECtin(clec-3)	Caenorhabditis elegans			GO:0030246~carbohydrate binding,	IPR000859:CUB domain,IPR001304:C-type lectin,IPR016186:C-type lectin-like,IPR016187:C-type lectin fold,IPR018378:C-type lectin, conserved site,		SM00034:CLECT,SM00042:CUB,	Complete proteome,Disulfide bond,Lectin,Reference proteome,Signal,
cutl-20	CUTiclin-Like(cutl-20)	Caenorhabditis elegans				IPR001507:Zona pellucida domain,			Complete proteome,Proteomics identification,Reference proteome,Signal,
cpr-4	Cathepsin B-like cysteine proteinase 4(cpr-4)	Caenorhabditis elegans	GO:0006508~proteolysis,GO:0051603~proteolysis involved in cellular protein catabolic process,	GO:0005615~extracellular space,GO:0005764~lysosome,	GO:0004197~cysteine-type endopeptidase activity,GO:0008233~peptidase activity,GO:0008234~cysteine-type peptidase activity,GO:0016787~hydrolase activity,	IPR000169:Cysteine peptidase, cysteine active site,IPR000668:Peptidase C1A, papain C-terminal,IPR013128:Peptidase C1A, papain,IPR025660:Cysteine peptidase, histidine active site,IPR025661:Cysteine peptidase, asparagine active site,	cel04142:Lysosome,	SM00645:Pept_C1,	Complete proteome,Disulfide bond,Glycoprotein,Hydrolase,Protease,Reference proteome,Signal,Thiol protease,Zymogen,	chain:Cathepsin B-like cysteine proteinase 4,disulfide bond,glycosylation site:N-linked (GlcNAc...),signal peptide,
catp-2	Cation transporting ATPase(catp-2)	Caenorhabditis elegans	GO:0008152~metabolic process,GO:0098655~cation transmembrane transport,	GO:0005887~integral component of plasma membrane,GO:0016020~membrane,GO:0016021~integral component of membrane,GO:0043231~intracellular membrane-bounded organelle,	GO:0000166~nucleotide binding,GO:0005524~ATP binding,GO:0016787~hydrolase activity,GO:0019829~cation-transporting ATPase activity,GO:0046872~metal ion binding,	IPR001757:Cation-transporting P-type ATPase,IPR004014:Cation-transporting P-type ATPase, N-terminal,IPR006068:Cation-transporting P-type ATPase, C-terminal,IPR008250:P-type ATPase, A domain,IPR018303:P-type ATPase, phosphorylation site,IPR023214:HAD-like domain,IPR023298:P-type ATPase, transmembrane domain,IPR023299:P-type ATPase, cytoplasmic domain N,		SM00831:SM00831,	ATP-binding,Complete proteome,Hydrolase,Membrane,Nucleotide-binding,Reference proteome,Transmembrane,Transmembrane helix,
lips-15	LIPaSe related(lips-15)	Caenorhabditis elegans	GO:0008152~metabolic process,		GO:0016787~hydrolase activity,	IPR002918:Lipase EstA/Esterase EstB,			Complete proteome,Proteomics identification,Reference proteome,Signal,
nhr-74	Nuclear Hormone Receptor family(nhr-74)	Caenorhabditis elegans	GO:0006351~transcription, DNA-templated,GO:0006355~regulation of transcription, DNA-templated,GO:0043401~steroid hormone mediated signaling pathway,	GO:0005634~nucleus,	GO:0003677~DNA binding,GO:0003700~transcription factor activity, sequence-specific DNA binding,GO:0008270~zinc ion binding,GO:0043565~sequence-specific DNA binding,GO:0046872~metal ion binding,	IPR000536:Nuclear hormone receptor, ligand-binding, core,IPR001628:Zinc finger, nuclear hormone receptor-type,IPR013088:Zinc finger, NHR/GATA-type,		SM00399:ZnF_C4,SM00430:HOLI,	Complete proteome,DNA-binding,Metal-binding,Nucleus,Receptor,Reference proteome,Transcription,Transcription regulation,Zinc,Zinc-finger,
prg-1	Piwi-like protein(prg-1)	Caenorhabditis elegans	GO:0000003~reproduction,GO:0007276~gamete generation,GO:0007283~spermatogenesis,GO:0034585~21U-RNA metabolic process,GO:0042078~germ-line stem cell division,GO:0045840~positive regulation of mitotic nuclear division,	GO:0043186~P granule,	GO:0003676~nucleic acid binding,GO:0034583~21U-RNA binding,	IPR003100:Argonaute/Dicer protein, PAZ,IPR003165:Stem cell self-renewal protein Piwi,IPR012337:Ribonuclease H-like domain,	cel04320:Dorso-ventral axis formation,	SM00949:SM00949,SM00950:SM00950,	Complete proteome,Proteomics identification,Reference proteome,
pud-4	Protein Up-regulated in Daf-2(gf)(pud-4)	Caenorhabditis elegans							Complete proteome,Proteomics identification,Reference proteome,
scl-25	SCP-Like extracellular protein(scl-25)	Caenorhabditis elegans				IPR001283:Allergen V5/Tpx-1-related,IPR014044:CAP domain,		SM00198:SCP,	Complete proteome,Reference proteome,Signal,
shc-1	SHC-transforming protein homolog 1(shc-1)	Caenorhabditis elegans	GO:0007169~transmembrane receptor protein tyrosine kinase signaling pathway,GO:0008340~determination of adult lifespan,GO:0010038~response to metal ion,GO:0033674~positive regulation of kinase activity,GO:0034976~response to endoplasmic reticulum stress,	GO:0005634~nucleus,GO:0005737~cytoplasm,GO:0005886~plasma membrane,GO:0016020~membrane,	GO:0005159~insulin-like growth factor receptor binding,GO:0030971~receptor tyrosine kinase binding,GO:0031434~mitogen-activated protein kinase kinase binding,	IPR000980:SH2 domain,IPR006020:Phosphotyrosine interaction domain,IPR011993:Pleckstrin homology-like domain,	cel04012:ErbB signaling pathway,	SM00252:SH2,SM00462:PTB,	Alternative splicing,Cell membrane,Complete proteome,Cytoplasm,Membrane,Nucleus,Reference proteome,SH2 domain,Stress response,
srh-2	Serpentine Receptor, class H(srh-2)	Caenorhabditis elegans	GO:0050907~detection of chemical stimulus involved in sensory perception,	GO:0016020~membrane,GO:0016021~integral component of membrane,		IPR019422:7TM GPCR, serpentine receptor class h (Srh),			Complete proteome,Membrane,Receptor,Reference proteome,Transmembrane,Transmembrane helix,
srx-56	Serpentine Receptor, class X(srx-56)	Caenorhabditis elegans		GO:0016020~membrane,GO:0016021~integral component of membrane,		IPR017452:GPCR, rhodopsin-like, 7TM,IPR019430:7TM GPCR, serpentine receptor class x (Srx),			Complete proteome,Membrane,Receptor,Reference proteome,Transmembrane,Transmembrane helix,
srx-68	Serpentine Receptor, class X(srx-68)	Caenorhabditis elegans		GO:0016020~membrane,GO:0016021~integral component of membrane,		IPR017452:GPCR, rhodopsin-like, 7TM,IPR019430:7TM GPCR, serpentine receptor class x (Srx),			Complete proteome,Membrane,Receptor,Reference proteome,Transmembrane,Transmembrane helix,
ugt-13	UDP-GlucuronosylTransferase(ugt-13)	Caenorhabditis elegans	GO:0008152~metabolic process,GO:0009813~flavonoid biosynthetic process,GO:0052696~flavonoid glucuronidation,	GO:0016020~membrane,GO:0016021~integral component of membrane,GO:0043231~intracellular membrane-bounded organelle,	GO:0015020~glucuronosyltransferase activity,GO:0016740~transferase activity,GO:0016758~transferase activity, transferring hexosyl groups,	IPR002213:UDP-glucuronosyl/UDP-glucosyltransferase,			Complete proteome,Membrane,Proteomics identification,Reference proteome,Signal,Transferase,Transmembrane,Transmembrane helix,
F56A4.10	hypothetical protein(F56A4.10)	Caenorhabditis elegans	GO:0055085~transmembrane transport,	GO:0016021~integral component of membrane,		IPR011701:Major facilitator superfamily,IPR020846:Major facilitator superfamily domain,			Complete proteome,Membrane,Reference proteome,Transmembrane,Transmembrane helix,
H36L18.2	hypothetical protein(H36L18.2)	Caenorhabditis elegans							Complete proteome,Reference proteome,
K08B12.3	hypothetical protein(K08B12.3)	Caenorhabditis elegans	GO:0016311~dephosphorylation,		GO:0016791~phosphatase activity,	IPR006355:HAD-superfamily hydrolase, subfamily IIA, hypothetical 2,IPR006357:HAD-superfamily hydrolase, subfamily IIA,IPR023214:HAD-like domain,IPR023215:Nitrophenylphosphatase-like domain,			Complete proteome,Proteomics identification,Reference proteome,
K08E7.5	hypothetical protein(K08E7.5)	Caenorhabditis elegans			GO:0005515~protein binding,				Complete proteome,Proteomics identification,Reference proteome,Signal,
T22F3.11	hypothetical protein(T22F3.11)	Caenorhabditis elegans	GO:0006820~anion transport,GO:0055085~transmembrane transport,	GO:0016020~membrane,GO:0016021~integral component of membrane,	GO:0022857~transmembrane transporter activity,	IPR011701:Major facilitator superfamily,IPR020846:Major facilitator superfamily domain,			Complete proteome,Membrane,Reference proteome,Transmembrane,Transmembrane helix,
T24B8.5	hypothetical protein(T24B8.5)	Caenorhabditis elegans	GO:0045087~innate immune response,			IPR003582:Metridin-like ShK toxin,		SM00254:ShKT,	Complete proteome,Reference proteome,Signal,
Y41C4A.11	hypothetical protein(Y41C4A.11)	Caenorhabditis elegans	GO:0006886~intracellular protein transport,GO:0006888~ER to Golgi vesicle-mediated transport,GO:0006890~retrograde vesicle-mediated transport, Golgi to ER,GO:0006891~intra-Golgi vesicle-mediated transport,GO:0030968~endoplasmic reticulum unfolded protein response,	GO:0016021~integral component of membrane,GO:0030126~COPI vesicle coat,		IPR001680:WD40 repeat,IPR006629:LPS-induced tumor necrosis factor alpha factor,IPR015943:WD40/YVTN repeat-like-containing domain,IPR017986:WD40-repeat-containing domain,IPR019775:WD40 repeat, conserved site,IPR020472:G-protein beta WD-40 repeat,		SM00320:WD40,SM00714:LITAF,	Complete proteome,Membrane,Proteomics identification,Reference proteome,Transmembrane,Transmembrane helix,
ZK6.8	hypothetical protein(ZK6.8)	Caenorhabditis elegans		GO:0016020~membrane,GO:0016021~integral component of membrane,		IPR010291:Ion channel regulatory protein, UNC-93,IPR020846:Major facilitator superfamily domain,			Complete proteome,Membrane,Reference proteome,Transmembrane,Transmembrane helix,

## Sheet: DAVID enrich ogt-1 vs N2 Fed
Annotation Cluster 1	Enrichment Score: 7.267002180090866
Category	Term	Count	%	PValue	Genes	List Total	Pop Hits	Pop Total	Fold Enrichment	Bonferroni	Benjamini	FDR
INTERPRO	IPR004045:Glutathione S-transferase, N-terminal	10	15.1515	3.24821e-13	GST-14, F56A4.3, GST-16, GST-4, GST-38, GST-7, GST-6, GST-10, GST-30, GST-12	55	54	14476	48.7407	1.94911e-11	1.94911e-11	3.25551e-10
INTERPRO	IPR004046:Glutathione S-transferase, C-terminal	9	13.6364	1.44816e-11	GST-14, GST-16, GST-4, GST-38, GST-7, GST-6, GST-10, GST-30, GST-12	55	52	14476	45.5538	8.68898e-10	4.34449e-10	1.4513e-08
INTERPRO	IPR010987:Glutathione S-transferase, C-terminal-like	9	13.6364	1.72632e-10	GST-14, GST-16, GST-4, GST-38, GST-7, GST-6, GST-10, GST-30, GST-12	55	70	14476	33.84	1.03579e-08	3.45264e-09	1.73006e-07
KEGG_PATHWAY	cel00980:Metabolism of xenobiotics by cytochrome P450	6	9.09091	5.14744e-09	GST-4, GST-38, GST-7, GST-6, GST-10, GST-30	9	32	3036	63.25	6.69167e-08	6.69167e-08	3.40792e-06
INTERPRO	IPR012336:Thioredoxin-like fold	10	15.1515	6.82752e-09	GST-14, F56A4.3, GST-16, GST-4, GST-38, GST-7, GST-6, GST-10, GST-30, GST-12	55	160	14476	16.45	4.09651e-07	8.19303e-08	6.84231e-06
KEGG_PATHWAY	cel00982:Drug metabolism - cytochrome P450	6	9.09091	9.60442e-09	GST-4, GST-38, GST-7, GST-6, GST-10, GST-30	9	36	3036	56.2222	1.24857e-07	6.24287e-08	6.35872e-06
KEGG_PATHWAY	cel00480:Glutathione metabolism	6	9.09091	1.6708e-08	GST-4, GST-38, GST-7, GST-6, GST-10, GST-30	9	40	3036	50.6	2.17204e-07	7.24014e-08	1.10617e-05
UP_SEQ_FEATURE	domain:GST N-terminal	4	6.06061	1.77048e-07	GST-4, GST-7, GST-6, GST-10	5	13	3383	208.185	1.06229e-06	1.06229e-06	8.4733e-05
UP_SEQ_FEATURE	domain:GST C-terminal	4	6.06061	2.25284e-07	GST-4, GST-7, GST-6, GST-10	5	14	3383	193.314	1.3517e-06	6.75852e-07	0.000107818
GOTERM_MF_DIRECT	GO:0016740~transferase activity	12	18.1818	5.36526e-05	GST-14, GST-16, UGT-13, GST-4, GST-38, GST-7, CYSL-2, GST-6, GST-10, GST-30, OAC-54, GST-12	33	836	9479	4.1231	0.00192968	0.000965306	0.0478441
GOTERM_MF_DIRECT	GO:0004364~glutathione transferase activity	4	6.06061	9.67557e-05	GST-4, GST-7, GST-6, GST-10	33	27	9479	42.5544	0.00347731	0.00116045	0.0862661
UP_KEYWORDS	Transferase	12	18.1818	0.000134122	GST-14, GST-16, UGT-13, GST-4, GST-38, GST-7, CYSL-2, GST-6, GST-10, GST-30, OAC-54, GST-12	63	954	20248	4.04273	0.00388223	0.001943	0.113188
GOTERM_BP_DIRECT	GO:0008152~metabolic process	13	19.697	0.000265797	GST-14, LIPS-15, GST-16, TRE-2, GST-38, GST-7, GST-6, GST-30, GST-12, UGT-13, ILYS-5, Y105C5B.15, OAC-54	43	1063	11627	3.30681	0.0118912	0.00596338	0.249686
Annotation Cluster 2	Enrichment Score: 4.8269515255538415
Category	Term	Count	%	PValue	Genes	List Total	Pop Hits	Pop Total	Fold Enrichment	Bonferroni	Benjamini	FDR
SMART	SM00034:CLECT	8	12.1212	1.71089e-07	CLEC-66, CLEC-3, F56A4.2, CLEC-143, CLEC-86, CLEC-73, CLEC-74, CLEC-79	14	221	5688	14.7072	1.36871e-06	1.36871e-06	9.36639e-05
INTERPRO	IPR001304:C-type lectin	8	12.1212	1.95522e-05	CLEC-66, CLEC-3, F56A4.2, CLEC-143, CLEC-86, CLEC-73, CLEC-74, CLEC-79	55	226	14476	9.31681	0.00117245	0.000195504	0.0195928
UP_KEYWORDS	Lectin	8	12.1212	2.52291e-05	CLEC-66, CLEC-3, F56A4.2, CLEC-143, CLEC-86, CLEC-73, CLEC-74, CLEC-79	63	284	20248	9.05343	0.000731384	0.000731384	0.0213
INTERPRO	IPR016186:C-type lectin-like	8	12.1212	3.92868e-05	CLEC-66, CLEC-3, F56A4.2, CLEC-143, CLEC-86, CLEC-73, CLEC-74, CLEC-79	55	252	14476	8.35556	0.00235448	0.000336694	0.039365
GOTERM_MF_DIRECT	GO:0030246~carbohydrate binding	8	12.1212	5.0507e-05	CLEC-66, CLEC-3, F56A4.2, CLEC-143, CLEC-86, CLEC-73, CLEC-74, CLEC-79	33	300	9479	7.6598	0.00181665	0.00181665	0.0450396
INTERPRO	IPR016187:C-type lectin fold	8	12.1212	6.52189e-05	CLEC-66, CLEC-3, F56A4.2, CLEC-143, CLEC-86, CLEC-73, CLEC-74, CLEC-79	55	273	14476	7.71282	0.00390561	0.000489038	0.0653409
Annotation Cluster 3	Enrichment Score: 0.08918147334241888
Category	Term	Count	%	PValue	Genes	List Total	Pop Hits	Pop Total	Fold Enrichment	Bonferroni	Benjamini	FDR
GOTERM_CC_DIRECT	GO:0016021~integral component of membrane	8	12.1212	0.588482	M05D6.6, ASP-14, F56A4.10, UGT-13, SRX-68, SLC-36.4, C15A11.7, OAC-54	14	6032	11373	1.0774	0.999662	0.999662	99.3963
GOTERM_CC_DIRECT	GO:0016020~membrane	8	12.1212	0.609055	M05D6.6, ASP-14, SHC-1, UGT-13, SRX-68, SLC-36.4, C15A11.7, OAC-54	14	6114	11373	1.06295	0.999787	0.985394	99.5506
UP_KEYWORDS	Membrane	9	13.6364	0.999646	M05D6.6, ASP-14, SHC-1, F56A4.10, UGT-13, SRX-68, SLC-36.4, C15A11.7, OAC-54	63	6152	20248	0.470184	1	1	100
UP_KEYWORDS	Transmembrane helix	8	12.1212	0.999835	M05D6.6, ASP-14, F56A4.10, UGT-13, SRX-68, SLC-36.4, C15A11.7, OAC-54	63	5972	20248	0.430538	1	1	100
UP_KEYWORDS	Transmembrane	8	12.1212	0.999836	M05D6.6, ASP-14, F56A4.10, UGT-13, SRX-68, SLC-36.4, C15A11.7, OAC-54	63	5975	20248	0.430322	1	1	100

## Sheet: Dereg in ogt-1 vs N2 Starved
ID	Gene Name	Species	COG_ONTOLOGY	GOTERM_BP_DIRECT	GOTERM_CC_DIRECT	GOTERM_MF_DIRECT	INTERPRO	KEGG_PATHWAY	SMART	UP_KEYWORDS	UP_SEQ_FEATURE
asp-14	ASpartyl Protease(asp-14)	Caenorhabditis elegans		GO:0006508~proteolysis,GO:0030163~protein catabolic process,GO:0045087~innate immune response,	GO:0016020~membrane,GO:0016021~integral component of membrane,	GO:0004190~aspartic-type endopeptidase activity,GO:0008233~peptidase activity,	IPR001461:Peptidase A1,IPR021109:Aspartic peptidase,			Complete proteome,Hydrolase,Membrane,Protease,Proteomics identification,Reference proteome,Transmembrane,Transmembrane helix,
cysl-2	Bifunctional L-3-cyanoalanine synthase/cysteine synthase(cysl-2)	Caenorhabditis elegans		GO:0006535~cysteine biosynthetic process from serine,GO:0008652~cellular amino acid biosynthetic process,GO:0019344~cysteine biosynthetic process,	GO:0005737~cytoplasm,	GO:0004124~cysteine synthase activity,GO:0016740~transferase activity,GO:0016829~lyase activity,GO:0030170~pyridoxal phosphate binding,GO:0050017~L-3-cyanoalanine synthase activity,	IPR001216:Cysteine synthase/cystathionine beta-synthase P-phosphate-binding site,IPR001926:Tryptophan synthase beta subunit-like PLP-dependent enzymes superfamily,IPR005856:Cysteine synthase K/M,IPR005859:Cysteine synthase A,	cel00270:Cysteine and methionine metabolism,cel00920:Sulfur metabolism,cel01100:Metabolic pathways,cel01130:Biosynthesis of antibiotics,cel01200:Carbon metabolism,cel01230:Biosynthesis of amino acids,		Amino-acid biosynthesis,Complete proteome,Cysteine biosynthesis,Lyase,Pyridoxal phosphate,Reference proteome,Transferase,
clec-143	C-type LECtin(clec-143)	Caenorhabditis elegans				GO:0030246~carbohydrate binding,	IPR001304:C-type lectin,IPR002035:von Willebrand factor, type A,IPR016186:C-type lectin-like,IPR016187:C-type lectin fold,		SM00034:CLECT,SM00327:VWA,	Complete proteome,Lectin,Reference proteome,Signal,
clec-3	C-type LECtin(clec-3)	Caenorhabditis elegans				GO:0030246~carbohydrate binding,	IPR000859:CUB domain,IPR001304:C-type lectin,IPR016186:C-type lectin-like,IPR016187:C-type lectin fold,IPR018378:C-type lectin, conserved site,		SM00034:CLECT,SM00042:CUB,	Complete proteome,Disulfide bond,Lectin,Reference proteome,Signal,
clec-66	C-type LECtin(clec-66)	Caenorhabditis elegans		GO:0045087~innate immune response,		GO:0030246~carbohydrate binding,	IPR001304:C-type lectin,IPR002035:von Willebrand factor, type A,IPR016186:C-type lectin-like,IPR016187:C-type lectin fold,		SM00034:CLECT,SM00327:VWA,	Complete proteome,Lectin,Proteomics identification,Reference proteome,Signal,
clec-73	C-type LECtin(clec-73)	Caenorhabditis elegans				GO:0030246~carbohydrate binding,	IPR001304:C-type lectin,IPR016186:C-type lectin-like,IPR016187:C-type lectin fold,		SM00034:CLECT,	Complete proteome,Lectin,Proteomics identification,Reference proteome,
clec-74	C-type LECtin(clec-74)	Caenorhabditis elegans		GO:0045087~innate immune response,		GO:0030246~carbohydrate binding,	IPR001304:C-type lectin,IPR016186:C-type lectin-like,IPR016187:C-type lectin fold,		SM00034:CLECT,	Complete proteome,Lectin,Reference proteome,Signal,
clec-79	C-type LECtin(clec-79)	Caenorhabditis elegans				GO:0030246~carbohydrate binding,	IPR001304:C-type lectin,IPR016186:C-type lectin-like,IPR016187:C-type lectin fold,		SM00034:CLECT,	Complete proteome,Lectin,Proteomics identification,Reference proteome,
clec-86	C-type LECtin(clec-86)	Caenorhabditis elegans		GO:0045087~innate immune response,		GO:0030246~carbohydrate binding,	IPR001304:C-type lectin,IPR016186:C-type lectin-like,IPR016187:C-type lectin fold,		SM00034:CLECT,	Complete proteome,Lectin,Proteomics identification,Reference proteome,Signal,
cyp-34A4	CYtochrome P450 family(cyp-34A4)	Caenorhabditis elegans	Secondary metabolites biosynthesis, transport, and catabolism,	GO:0055114~oxidation-reduction process,		GO:0004497~monooxygenase activity,GO:0005506~iron ion binding,GO:0008395~steroid hydroxylase activity,GO:0016491~oxidoreductase activity,GO:0016705~oxidoreductase activity, acting on paired donors, with incorporation or reduction of molecular oxygen,GO:0020037~heme binding,GO:0046872~metal ion binding,	IPR001128:Cytochrome P450,IPR002401:Cytochrome P450, E-class, group I,IPR017972:Cytochrome P450, conserved site,			Complete proteome,Heme,Iron,Metal-binding,Monooxygenase,Oxidoreductase,Proteomics identification,Reference proteome,
dhs-4	DeHydrogenases, Short chain(dhs-4)	Caenorhabditis elegans	General function prediction only,				IPR002347:Glucose/ribitol dehydrogenase,IPR016040:NAD(P)-binding domain,			Complete proteome,Proteomics identification,Reference proteome,
dod-17	Downstream Of DAF-16 (regulated by DAF-16)(dod-17)	Caenorhabditis elegans		GO:0008340~determination of adult lifespan,GO:0045087~innate immune response,			IPR003366:CUB-like domain,			Complete proteome,Proteomics identification,Reference proteome,Signal,
dod-24	Downstream Of DAF-16 (regulated by DAF-16)(dod-24)	Caenorhabditis elegans		GO:0008340~determination of adult lifespan,GO:0045087~innate immune response,GO:0050829~defense response to Gram-negative bacterium,			IPR003366:CUB-like domain,			Complete proteome,Proteomics identification,Reference proteome,Signal,
grd-10	GRounDhog (hedgehog-like family)(grd-10)	Caenorhabditis elegans		GO:0018996~molting cycle, collagen and cuticulin-based cuticle,GO:0040011~locomotion,GO:0040018~positive regulation of multicellular organism growth,			IPR007284:Ground-like domain,			Complete proteome,Proteomics identification,Reference proteome,Signal,
gst-10	Glutathione S-Transferase(gst-10)	Caenorhabditis elegans		GO:0006749~glutathione metabolic process,GO:0008340~determination of adult lifespan,GO:0010225~response to UV-C,GO:0010286~heat acclimation,GO:0019915~lipid storage,GO:0042542~response to hydrogen peroxide,GO:0048871~multicellular organismal homeostasis,GO:0055114~oxidation-reduction process,		GO:0004364~glutathione transferase activity,GO:0016740~transferase activity,	IPR004045:Glutathione S-transferase, N-terminal,IPR004046:Glutathione S-transferase, C-terminal,IPR010987:Glutathione S-transferase, C-terminal-like,IPR012336:Thioredoxin-like fold,	cel00480:Glutathione metabolism,cel00980:Metabolism of xenobiotics by cytochrome P450,cel00982:Drug metabolism - cytochrome P450,		Complete proteome,Direct protein sequencing,Proteomics identification,Reference proteome,Transferase,	chain:Glutathione S-transferase P 10,domain:GST C-terminal,domain:GST N-terminal,
gst-12	Glutathione S-Transferase(gst-12)	Caenorhabditis elegans		GO:0008152~metabolic process,GO:0071688~striated muscle myosin thick filament assembly,		GO:0016740~transferase activity,	IPR004045:Glutathione S-transferase, N-terminal,IPR004046:Glutathione S-transferase, C-terminal,IPR010987:Glutathione S-transferase, C-terminal-like,IPR012336:Thioredoxin-like fold,			Complete proteome,Proteomics identification,Reference proteome,Transferase,
gst-14	Glutathione S-Transferase(gst-14)	Caenorhabditis elegans		GO:0008152~metabolic process,		GO:0016740~transferase activity,	IPR004045:Glutathione S-transferase, N-terminal,IPR004046:Glutathione S-transferase, C-terminal,IPR010987:Glutathione S-transferase, C-terminal-like,IPR012336:Thioredoxin-like fold,			Complete proteome,Reference proteome,Transferase,
gst-16	Glutathione S-Transferase(gst-16)	Caenorhabditis elegans		GO:0008152~metabolic process,		GO:0016740~transferase activity,	IPR004045:Glutathione S-transferase, N-terminal,IPR004046:Glutathione S-transferase, C-terminal,IPR010987:Glutathione S-transferase, C-terminal-like,IPR012336:Thioredoxin-like fold,			3D-structure,Complete proteome,Proteomics identification,Reference proteome,Transferase,
gst-30	Glutathione S-Transferase(gst-30)	Caenorhabditis elegans		GO:0008152~metabolic process,		GO:0016740~transferase activity,	IPR004045:Glutathione S-transferase, N-terminal,IPR004046:Glutathione S-transferase, C-terminal,IPR010987:Glutathione S-transferase, C-terminal-like,IPR012336:Thioredoxin-like fold,	cel00480:Glutathione metabolism,cel00980:Metabolism of xenobiotics by cytochrome P450,cel00982:Drug metabolism - cytochrome P450,		Complete proteome,Reference proteome,Transferase,
gst-38	Glutathione S-Transferase(gst-38)	Caenorhabditis elegans		GO:0008152~metabolic process,GO:0045087~innate immune response,		GO:0016740~transferase activity,	IPR004045:Glutathione S-transferase, N-terminal,IPR004046:Glutathione S-transferase, C-terminal,IPR010987:Glutathione S-transferase, C-terminal-like,IPR012336:Thioredoxin-like fold,	cel00480:Glutathione metabolism,cel00980:Metabolism of xenobiotics by cytochrome P450,cel00982:Drug metabolism - cytochrome P450,		Complete proteome,Proteomics identification,Reference proteome,Transferase,
gst-4	Glutathione S-transferase 4(gst-4)	Caenorhabditis elegans		GO:0006749~glutathione metabolic process,	GO:0043292~contractile fiber,	GO:0004364~glutathione transferase activity,GO:0016740~transferase activity,	IPR004045:Glutathione S-transferase, N-terminal,IPR004046:Glutathione S-transferase, C-terminal,IPR010987:Glutathione S-transferase, C-terminal-like,IPR012336:Thioredoxin-like fold,	cel00480:Glutathione metabolism,cel00980:Metabolism of xenobiotics by cytochrome P450,cel00982:Drug metabolism - cytochrome P450,		Complete proteome,Reference proteome,Transferase,	chain:Glutathione S-transferase 4,domain:GST C-terminal,domain:GST N-terminal,
hmg-20	HMG(hmg-20)	Caenorhabditis elegans		GO:0000003~reproduction,GO:0045132~meiotic chromosome segregation,			IPR009071:High mobility group (HMG) box domain,		SM00398:HMG,	Complete proteome,Proteomics identification,Reference proteome,
hsp-12.3	Heat Shock Protein(hsp-12.3)	Caenorhabditis elegans				GO:0031072~heat shock protein binding,GO:0051082~unfolded protein binding,	IPR001436:Alpha crystallin/Heat shock protein,IPR002068:Alpha crystallin/Hsp20 domain,IPR008978:HSP20-like chaperone,			Complete proteome,Proteomics identification,Reference proteome,Stress response,
ilys-5	Invertebrate LYSozyme(ilys-5)	Caenorhabditis elegans		GO:0008152~metabolic process,GO:0009792~embryo development ending in birth or egg hatching,		GO:0003796~lysozyme activity,	IPR008597:Destabilase,IPR023346:Lysozyme-like domain,			Complete proteome,Proteomics identification,Reference proteome,Signal,
lips-15	LIPaSe related(lips-15)	Caenorhabditis elegans		GO:0008152~metabolic process,		GO:0016787~hydrolase activity,	IPR002918:Lipase EstA/Esterase EstB,			Complete proteome,Proteomics identification,Reference proteome,Signal,
lys-4	LYSozyme(lys-4)	Caenorhabditis elegans		GO:0005975~carbohydrate metabolic process,GO:0009253~peptidoglycan catabolic process,GO:0016998~cell wall macromolecule catabolic process,		GO:0003796~lysozyme activity,	IPR002053:Glycoside hydrolase, family 25,IPR013781:Glycoside hydrolase, catalytic domain,IPR017853:Glycoside hydrolase, superfamily,			Complete proteome,Proteomics identification,Reference proteome,Signal,
mtl-2	Metallothionein-2(mtl-2)	Caenorhabditis elegans		GO:0008340~determination of adult lifespan,GO:0009408~response to heat,GO:0040007~growth,GO:0046686~response to cadmium ion,		GO:0046872~metal ion binding,	IPR000853:Metallothionein, family 6, nematoda,			Cadmium,Complete proteome,Direct protein sequencing,Metal-binding,Metal-thiolate cluster,Reference proteome,	chain:Metallothionein-2,
mul-1	Mucin Like Gene(mul-1)	Caenorhabditis elegans		GO:0010332~response to gamma radiation,			IPR003582:Metridin-like ShK toxin,		SM00254:ShKT,	Complete proteome,Reference proteome,Signal,
nit-1	NITrilase(nit-1)	Caenorhabditis elegans	General function prediction only,	GO:0006807~nitrogen compound metabolic process,		GO:0016810~hydrolase activity, acting on carbon-nitrogen (but not peptide) bonds,	IPR000132:Nitrilase/cyanide hydratase, conserved site,IPR003010:Carbon-nitrogen hydrolase,	cel00380:Tryptophan metabolism,cel00460:Cyanoamino acid metabolism,cel00910:Nitrogen metabolism,		Complete proteome,Proteomics identification,Reference proteome,
oac-54	O-ACyltransferase homolog(oac-54)	Caenorhabditis elegans		GO:0008152~metabolic process,GO:0018991~oviposition,	GO:0016020~membrane,GO:0016021~integral component of membrane,	GO:0016740~transferase activity,GO:0016746~transferase activity, transferring acyl groups,GO:0016747~transferase activity, transferring acyl groups other than amino-acyl groups,	IPR002656:Acyltransferase 3,			Acyltransferase,Complete proteome,Membrane,Reference proteome,Transferase,Transmembrane,Transmembrane helix,
gst-6	Probable glutathione S-transferase 6(gst-6)	Caenorhabditis elegans		GO:0008152~metabolic process,GO:0045087~innate immune response,		GO:0004364~glutathione transferase activity,GO:0016740~transferase activity,	IPR004045:Glutathione S-transferase, N-terminal,IPR004046:Glutathione S-transferase, C-terminal,IPR010987:Glutathione S-transferase, C-terminal-like,IPR012336:Thioredoxin-like fold,	cel00480:Glutathione metabolism,cel00980:Metabolism of xenobiotics by cytochrome P450,cel00982:Drug metabolism - cytochrome P450,		Complete proteome,Reference proteome,Transferase,	chain:Probable glutathione S-transferase 6,domain:GST C-terminal,domain:GST N-terminal,
gst-7	Probable glutathione S-transferase 7(gst-7)	Caenorhabditis elegans		GO:0008152~metabolic process,GO:0045087~innate immune response,		GO:0004364~glutathione transferase activity,GO:0016740~transferase activity,	IPR004045:Glutathione S-transferase, N-terminal,IPR004046:Glutathione S-transferase, C-terminal,IPR010987:Glutathione S-transferase, C-terminal-like,IPR012336:Thioredoxin-like fold,	cel00480:Glutathione metabolism,cel00980:Metabolism of xenobiotics by cytochrome P450,cel00982:Drug metabolism - cytochrome P450,		Complete proteome,Reference proteome,Transferase,	chain:Probable glutathione S-transferase 7,domain:GST C-terminal,domain:GST N-terminal,
pud-1.1	Protein Up-regulated in Daf-2(gf)(pud-1.1)	Caenorhabditis elegans								3D-structure,Complete proteome,Proteomics identification,Reference proteome,
pud-2.1	Protein Up-regulated in Daf-2(gf)(pud-2.1)	Caenorhabditis elegans								3D-structure,Complete proteome,Proteomics identification,Reference proteome,
pud-4	Protein Up-regulated in Daf-2(gf)(pud-4)	Caenorhabditis elegans								Complete proteome,Proteomics identification,Reference proteome,
Y105C5B.15	Purple acid phosphatase(Y105C5B.15)	Caenorhabditis elegans		GO:0008152~metabolic process,GO:0016311~dephosphorylation,		GO:0003993~acid phosphatase activity,GO:0016787~hydrolase activity,GO:0046872~metal ion binding,	IPR004843:Metallophosphoesterase domain,IPR008963:Purple acid phosphatase-like, N-terminal,IPR015914:Purple acid phosphatase, N-terminal,IPR025733:Iron/zinc purple acid phosphatase-like C-terminal domain,			Complete proteome,Hydrolase,Proteomics identification,Reference proteome,Signal,
shc-1	SHC-transforming protein homolog 1(shc-1)	Caenorhabditis elegans		GO:0007169~transmembrane receptor protein tyrosine kinase signaling pathway,GO:0008340~determination of adult lifespan,GO:0010038~response to metal ion,GO:0033674~positive regulation of kinase activity,GO:0034976~response to endoplasmic reticulum stress,	GO:0005634~nucleus,GO:0005737~cytoplasm,GO:0005886~plasma membrane,GO:0016020~membrane,	GO:0005159~insulin-like growth factor receptor binding,GO:0030971~receptor tyrosine kinase binding,GO:0031434~mitogen-activated protein kinase kinase binding,	IPR000980:SH2 domain,IPR006020:Phosphotyrosine interaction domain,IPR011993:Pleckstrin homology-like domain,	cel04012:ErbB signaling pathway,	SM00252:SH2,SM00462:PTB,	Alternative splicing,Cell membrane,Complete proteome,Cytoplasm,Membrane,Nucleus,Reference proteome,SH2 domain,Stress response,
slc-36.4	SLC (SoLute Carrier) homolog(slc-36.4)	Caenorhabditis elegans		GO:0003333~amino acid transmembrane transport,GO:0015807~L-amino acid transport,GO:1902475~L-alpha-amino acid transmembrane transport,	GO:0016020~membrane,GO:0016021~integral component of membrane,	GO:0015171~amino acid transmembrane transporter activity,GO:0015179~L-amino acid transmembrane transporter activity,	IPR013057:Amino acid transporter, transmembrane,			Complete proteome,Membrane,Reference proteome,Transmembrane,Transmembrane helix,
srx-68	Serpentine Receptor, class X(srx-68)	Caenorhabditis elegans			GO:0016020~membrane,GO:0016021~integral component of membrane,		IPR017452:GPCR, rhodopsin-like, 7TM,IPR019430:7TM GPCR, serpentine receptor class x (Srx),			Complete proteome,Membrane,Receptor,Reference proteome,Transmembrane,Transmembrane helix,
tre-2	Trehalase(tre-2)	Caenorhabditis elegans		GO:0005991~trehalose metabolic process,GO:0005993~trehalose catabolic process,GO:0008152~metabolic process,		GO:0003824~catalytic activity,GO:0004555~alpha,alpha-trehalase activity,GO:0016787~hydrolase activity,GO:0016798~hydrolase activity, acting on glycosyl bonds,	IPR001661:Glycoside hydrolase, family 37,IPR008928:Six-hairpin glycosidase-like,			Complete proteome,Glycosidase,Hydrolase,Proteomics identification,Reference proteome,
ugt-13	UDP-GlucuronosylTransferase(ugt-13)	Caenorhabditis elegans		GO:0008152~metabolic process,GO:0009813~flavonoid biosynthetic process,GO:0052696~flavonoid glucuronidation,	GO:0016020~membrane,GO:0016021~integral component of membrane,GO:0043231~intracellular membrane-bounded organelle,	GO:0015020~glucuronosyltransferase activity,GO:0016740~transferase activity,GO:0016758~transferase activity, transferring hexosyl groups,	IPR002213:UDP-glucuronosyl/UDP-glucosyltransferase,			Complete proteome,Membrane,Proteomics identification,Reference proteome,Signal,Transferase,Transmembrane,Transmembrane helix,
gst-4	glutathione S-transferase-4(gst-4)	Neurospora crassa OR74A	Posttranslational modification, protein turnover, chaperones,	GO:0006749~glutathione metabolic process,	GO:0005634~nucleus,GO:0005737~cytoplasm,	GO:0003746~translation elongation factor activity,GO:0004364~glutathione transferase activity,	IPR004045:Glutathione S-transferase, N-terminal,IPR004046:Glutathione S-transferase, C-terminal,IPR010987:Glutathione S-transferase, C-terminal-like,IPR012336:Thioredoxin-like fold,			Complete proteome,Reference proteome,Transferase,
C15A11.7	hypothetical protein(C15A11.7)	Caenorhabditis elegans			GO:0016020~membrane,GO:0016021~integral component of membrane,		IPR002781:Transmembrane protein TauE like,			Complete proteome,Membrane,Proteomics identification,Reference proteome,Transmembrane,Transmembrane helix,
C17H12.8	hypothetical protein(C17H12.8)	Caenorhabditis elegans		GO:0045087~innate immune response,GO:0050829~defense response to Gram-negative bacterium,	GO:0045121~membrane raft,		IPR003366:CUB-like domain,			Complete proteome,Proteomics identification,Reference proteome,Signal,
C32H11.4	hypothetical protein(C32H11.4)	Caenorhabditis elegans		GO:0045087~innate immune response,			IPR003366:CUB-like domain,			Complete proteome,Proteomics identification,Reference proteome,Signal,
F01D5.2	hypothetical protein(F01D5.2)	Caenorhabditis elegans					IPR003582:Metridin-like ShK toxin,		SM00254:ShKT,	Complete proteome,Reference proteome,Signal,
F14D2.19	hypothetical protein(F14D2.19)	Caenorhabditis elegans								Complete proteome,Reference proteome,
F18E3.11	hypothetical protein(F18E3.11)	Caenorhabditis elegans								Complete proteome,Reference proteome,
F45D11.15	hypothetical protein(F45D11.15)	Caenorhabditis elegans					IPR007767:Protein of unknown function DUF684,			Complete proteome,Reference proteome,
F55G11.2	hypothetical protein(F55G11.2)	Caenorhabditis elegans		GO:0045087~innate immune response,			IPR003366:CUB-like domain,			Complete proteome,Proteomics identification,Reference proteome,Signal,
F55G11.7	hypothetical protein(F55G11.7)	Caenorhabditis elegans		GO:0045087~innate immune response,			IPR003366:CUB-like domain,			Complete proteome,Reference proteome,Signal,
F55G11.8	hypothetical protein(F55G11.8)	Caenorhabditis elegans		GO:0045087~innate immune response,			IPR003366:CUB-like domain,			Complete proteome,Proteomics identification,Reference proteome,Signal,
F55H12.4	hypothetical protein(F55H12.4)	Caenorhabditis elegans								Complete proteome,Proteomics identification,Reference proteome,Signal,
F56A4.10	hypothetical protein(F56A4.10)	Caenorhabditis elegans		GO:0055085~transmembrane transport,	GO:0016021~integral component of membrane,		IPR011701:Major facilitator superfamily,IPR020846:Major facilitator superfamily domain,			Complete proteome,Membrane,Reference proteome,Transmembrane,Transmembrane helix,
F56A4.2	hypothetical protein(F56A4.2)	Caenorhabditis elegans		GO:0045087~innate immune response,		GO:0030246~carbohydrate binding,	IPR001304:C-type lectin,IPR016186:C-type lectin-like,IPR016187:C-type lectin fold,		SM00034:CLECT,	Complete proteome,Lectin,Proteomics identification,Reference proteome,Signal,
F56A4.3	hypothetical protein(F56A4.3)	Caenorhabditis elegans		GO:0008340~determination of adult lifespan,GO:0019915~lipid storage,GO:0048871~multicellular organismal homeostasis,			IPR004045:Glutathione S-transferase, N-terminal,IPR012336:Thioredoxin-like fold,			Complete proteome,Reference proteome,
F56D5.3	hypothetical protein(F56D5.3)	Caenorhabditis elegans		GO:0055114~oxidation-reduction process,	GO:0005622~intracellular,	GO:0003824~catalytic activity,GO:0003959~NADPH dehydrogenase activity,GO:0010181~FMN binding,GO:0016491~oxidoreductase activity,	IPR001155:NADH:flavin oxidoreductase/NADH oxidase, N-terminal,IPR013785:Aldolase-type TIM barrel,			Complete proteome,Proteomics identification,Reference proteome,
H20E11.3	hypothetical protein(H20E11.3)	Caenorhabditis elegans		GO:0045087~innate immune response,GO:0050829~defense response to Gram-negative bacterium,	GO:0045121~membrane raft,		IPR000859:CUB domain,IPR003366:CUB-like domain,			Complete proteome,Reference proteome,Signal,
M05D6.6	hypothetical protein(M05D6.6)	Caenorhabditis elegans			GO:0016020~membrane,GO:0016021~integral component of membrane,		IPR009432:Protein of unknown function DUF1075,			Complete proteome,Membrane,Proteomics identification,Reference proteome,Transmembrane,Transmembrane helix,
T02B11.4	hypothetical protein(T02B11.4)	Caenorhabditis elegans								Complete proteome,Proteomics identification,Reference proteome,Signal,
T19D12.3	hypothetical protein(T19D12.3)	Caenorhabditis elegans		GO:0019915~lipid storage,			IPR002035:von Willebrand factor, type A,			Complete proteome,Reference proteome,
Y42G9A.3	hypothetical protein(Y42G9A.3)	Caenorhabditis elegans	Function unknown,				IPR001611:Leucine-rich repeat,IPR003591:Leucine-rich repeat, typical subtype,		SM00369:LRR_TYP,	Complete proteome,Reference proteome,
ZC395.4	hypothetical protein(ZC395.4)	Caenorhabditis elegans		GO:0000003~reproduction,						Complete proteome,Reference proteome,
tag-293	hypothetical protein(tag-293)	Caenorhabditis elegans					IPR003582:Metridin-like ShK toxin,		SM00254:ShKT,	Complete proteome,Reference proteome,Signal,
shc-1	squalene cyclase(shc-1)	Geobacter sulfurreducens PCA		GO:0019746~hopanoid biosynthetic process,		GO:0016866~intramolecular transferase activity,	IPR006400:Hopene cyclase,IPR008930:Terpenoid cyclases/protein prenyltransferase alpha-alpha toroid,IPR018333:Squalene cyclase,	gsu00909:Sesquiterpenoid and triterpenoid biosynthesis,gsu01110:Biosynthesis of secondary metabolites,		Complete proteome,Reference proteome,
tre-2	trehalase-2(tre-2)	Neurospora crassa OR74A	Carbohydrate transport and metabolism,	GO:0005993~trehalose catabolic process,	GO:0005737~cytoplasm,	GO:0004555~alpha,alpha-trehalase activity,GO:0005509~calcium ion binding,	IPR001661:Glycoside hydrolase, family 37,IPR008928:Six-hairpin glycosidase-like,IPR011120:Neutral trehalase Ca2+ binding,IPR018232:Glycoside hydrolase, family 37, conserved site,	ncr00500:Starch and sucrose metabolism,ncr01100:Metabolic pathways,		Complete proteome,Cytoplasm,Glycosidase,Hydrolase,Reference proteome,	chain:Neutral trehalase,

## Sheet: DAVID enrich ogt-1 vs N2 Starve
Category	Term	Count	%	PValue	Genes	List Total	Pop Hits	Pop Total	Fold Enrichment	Bonferroni	Benjamini	FDR
GOTERM_BP_DIRECT	GO:0045087~innate immune response	16	24.2424	1.24936e-13	F55G11.2, DOD-17, F56A4.2, GST-38, GST-7, GST-6, DOD-24, F55G11.8, C32H11.4, F55G11.7, CLEC-66, ASP-14, CLEC-86, CLEC-74, C17H12.8, H20E11.3	43	317	11627	13.6477	5.6205e-12	5.6205e-12	1.17462e-10
INTERPRO	IPR004045:Glutathione S-transferase, N-terminal	10	15.1515	3.24821e-13	GST-14, F56A4.3, GST-16, GST-4, GST-38, GST-7, GST-6, GST-10, GST-30, GST-12	55	54	14476	48.7407	1.94911e-11	1.94911e-11	3.25551e-10
INTERPRO	IPR004046:Glutathione S-transferase, C-terminal	9	13.6364	1.44816e-11	GST-14, GST-16, GST-4, GST-38, GST-7, GST-6, GST-10, GST-30, GST-12	55	52	14476	45.5538	8.68898e-10	4.34449e-10	1.4513e-08
INTERPRO	IPR010987:Glutathione S-transferase, C-terminal-like	9	13.6364	1.72632e-10	GST-14, GST-16, GST-4, GST-38, GST-7, GST-6, GST-10, GST-30, GST-12	55	70	14476	33.84	1.03579e-08	3.45264e-09	1.73006e-07
INTERPRO	IPR003366:CUB-like domain	8	12.1212	5.93016e-10	F55G11.2, DOD-17, C17H12.8, DOD-24, H20E11.3, F55G11.8, C32H11.4, F55G11.7	55	50	14476	42.112	3.5581e-08	8.89524e-09	5.94301e-07
KEGG_PATHWAY	cel00980:Metabolism of xenobiotics by cytochrome P450	6	9.09091	5.14744e-09	GST-4, GST-38, GST-7, GST-6, GST-10, GST-30	9	32	3036	63.25	6.69167e-08	6.69167e-08	3.40792e-06
INTERPRO	IPR012336:Thioredoxin-like fold	10	15.1515	6.82752e-09	GST-14, F56A4.3, GST-16, GST-4, GST-38, GST-7, GST-6, GST-10, GST-30, GST-12	55	160	14476	16.45	4.09651e-07	8.19303e-08	6.84231e-06
KEGG_PATHWAY	cel00982:Drug metabolism - cytochrome P450	6	9.09091	9.60442e-09	GST-4, GST-38, GST-7, GST-6, GST-10, GST-30	9	36	3036	56.2222	1.24857e-07	6.24287e-08	6.35872e-06
KEGG_PATHWAY	cel00480:Glutathione metabolism	6	9.09091	1.6708e-08	GST-4, GST-38, GST-7, GST-6, GST-10, GST-30	9	40	3036	50.6	2.17204e-07	7.24014e-08	1.10617e-05
SMART	SM00034:CLECT	8	12.1212	1.71089e-07	CLEC-66, CLEC-3, F56A4.2, CLEC-143, CLEC-86, CLEC-73, CLEC-74, CLEC-79	14	221	5688	14.7072	1.36871e-06	1.36871e-06	9.36639e-05
UP_SEQ_FEATURE	domain:GST N-terminal	4	6.06061	1.77048e-07	GST-4, GST-7, GST-6, GST-10	5	13	3383	208.185	1.06229e-06	1.06229e-06	8.4733e-05
UP_SEQ_FEATURE	domain:GST C-terminal	4	6.06061	2.25284e-07	GST-4, GST-7, GST-6, GST-10	5	14	3383	193.314	1.3517e-06	6.75852e-07	0.000107818
INTERPRO	IPR001304:C-type lectin	8	12.1212	1.95522e-05	CLEC-66, CLEC-3, F56A4.2, CLEC-143, CLEC-86, CLEC-73, CLEC-74, CLEC-79	55	226	14476	9.31681	0.00117245	0.000195504	0.0195928
UP_KEYWORDS	Lectin	8	12.1212	2.52291e-05	CLEC-66, CLEC-3, F56A4.2, CLEC-143, CLEC-86, CLEC-73, CLEC-74, CLEC-79	63	284	20248	9.05343	0.000731384	0.000731384	0.0213
INTERPRO	IPR016186:C-type lectin-like	8	12.1212	3.92868e-05	CLEC-66, CLEC-3, F56A4.2, CLEC-143, CLEC-86, CLEC-73, CLEC-74, CLEC-79	55	252	14476	8.35556	0.00235448	0.000336694	0.039365
GOTERM_MF_DIRECT	GO:0030246~carbohydrate binding	8	12.1212	5.0507e-05	CLEC-66, CLEC-3, F56A4.2, CLEC-143, CLEC-86, CLEC-73, CLEC-74, CLEC-79	33	300	9479	7.6598	0.00181665	0.00181665	0.0450396
GOTERM_MF_DIRECT	GO:0016740~transferase activity	12	18.1818	5.36526e-05	GST-14, GST-16, UGT-13, GST-4, GST-38, GST-7, CYSL-2, GST-6, GST-10, GST-30, OAC-54, GST-12	33	836	9479	4.1231	0.00192968	0.000965306	0.0478441
INTERPRO	IPR016187:C-type lectin fold	8	12.1212	6.52189e-05	CLEC-66, CLEC-3, F56A4.2, CLEC-143, CLEC-86, CLEC-73, CLEC-74, CLEC-79	55	273	14476	7.71282	0.00390561	0.000489038	0.0653409
GOTERM_MF_DIRECT	GO:0004364~glutathione transferase activity	4	6.06061	9.67557e-05	GST-4, GST-7, GST-6, GST-10	33	27	9479	42.5544	0.00347731	0.00116045	0.0862661
UP_KEYWORDS	Transferase	12	18.1818	0.000134122	GST-14, GST-16, UGT-13, GST-4, GST-38, GST-7, CYSL-2, GST-6, GST-10, GST-30, OAC-54, GST-12	63	954	20248	4.04273	0.00388223	0.001943	0.113188
GOTERM_BP_DIRECT	GO:0008152~metabolic process	13	19.697	0.000265797	GST-14, LIPS-15, GST-16, TRE-2, GST-38, GST-7, GST-6, GST-30, GST-12, UGT-13, ILYS-5, Y105C5B.15, OAC-54	43	1063	11627	3.30681	0.0118912	0.00596338	0.249686
UP_KEYWORDS	Signal	25	37.8788	0.000527906	F55G11.2, GRD-10, F56A4.2, F01D5.2, LYS-4, DOD-24, F55G11.8, F55G11.7, CLEC-66, ILYS-5, CLEC-143, CLEC-86, MUL-1, DOD-17, LIPS-15, F55H12.4, C32H11.4, CLEC-3, UGT-13, TAG-293, CLEC-74, Y105C5B.15, C17H12.8, T02B11.4, H20E11.3	63	4052	20248	1.98295	0.0151967	0.00509143	0.444859
INTERPRO	IPR002035:von Willebrand factor, type A	3	4.54545	0.022391	CLEC-66, CLEC-143, T19D12.3	55	62	14476	12.7355	0.743013	0.140127	20.3036
SMART	SM00254:ShKT	3	4.54545	0.0234724	F01D5.2, TAG-293, MUL-1	14	106	5688	11.4987	0.173056	0.0906352	12.1934
GOTERM_BP_DIRECT	GO:0048871~multicellular organismal homeostasis	2	3.0303	0.02502	F56A4.3, GST-10	43	7	11627	77.2558	0.680252	0.31619	21.2026
GOTERM_MF_DIRECT	GO:0003796~lysozyme activity	2	3.0303	0.0332661	LYS-4, ILYS-5	33	10	9479	57.4485	0.704165	0.262499	26.0483
GOTERM_BP_DIRECT	GO:0050829~defense response to Gram-negative bacterium	3	4.54545	0.0368499	C17H12.8, DOD-24, H20E11.3	43	84	11627	9.65698	0.815401	0.344523	29.749
INTERPRO	IPR003582:Metridin-like ShK toxin	3	4.54545	0.0675112	F01D5.2, TAG-293, MUL-1	55	114	14476	6.92632	0.984912	0.342551	50.3661
GOTERM_BP_DIRECT	GO:0006749~glutathione metabolic process	2	3.0303	0.0765939	GST-4, GST-10	43	22	11627	24.5814	0.972288	0.511871	52.7348
GOTERM_CC_DIRECT	GO:0045121~membrane raft	2	3.0303	0.0792857	C17H12.8, H20E11.3	14	72	11373	22.5655	0.524529	0.524529	37.8361
SMART	SM00327:VWA	2	3.0303	0.0982037	CLEC-66, CLEC-143	14	45	5688	18.0571	0.562611	0.240917	43.2144

## Sheet: Dereg in oga-1 vs N2 Fed 
ID	Gene Name	Species	GOTERM_BP_DIRECT	GOTERM_CC_DIRECT	GOTERM_MF_DIRECT	INTERPRO	KEGG_PATHWAY	PIR_SUPERFAMILY	SMART	UP_KEYWORDS	UP_SEQ_FEATURE
cpr-4	Cathepsin B-like cysteine proteinase 4(cpr-4)	Caenorhabditis elegans	GO:0006508~proteolysis,GO:0051603~proteolysis involved in cellular protein catabolic process,	GO:0005615~extracellular space,GO:0005764~lysosome,	GO:0004197~cysteine-type endopeptidase activity,GO:0008233~peptidase activity,GO:0008234~cysteine-type peptidase activity,GO:0016787~hydrolase activity,	IPR000169:Cysteine peptidase, cysteine active site,IPR000668:Peptidase C1A, papain C-terminal,IPR013128:Peptidase C1A, papain,IPR025660:Cysteine peptidase, histidine active site,IPR025661:Cysteine peptidase, asparagine active site,	cel04142:Lysosome,		SM00645:Pept_C1,	Complete proteome,Disulfide bond,Glycoprotein,Hydrolase,Protease,Reference proteome,Signal,Thiol protease,Zymogen,	chain:Cathepsin B-like cysteine proteinase 4,disulfide bond,glycosylation site:N-linked (GlcNAc...),signal peptide,
srd-27	Serpentine Receptor, class D (delta)(srd-27)	Caenorhabditis elegans	GO:0009792~embryo development ending in birth or egg hatching,	GO:0016020~membrane,GO:0016021~integral component of membrane,		IPR019421:7TM GPCR, serpentine receptor class d (Srd),				Complete proteome,Membrane,Receptor,Reference proteome,Transmembrane,Transmembrane helix,
srw-85	Serpentine Receptor, class W(srw-85)	Caenorhabditis elegans	GO:0007186~G-protein coupled receptor signaling pathway,	GO:0016020~membrane,GO:0016021~integral component of membrane,	GO:0008528~G-protein coupled peptide receptor activity,	IPR017452:GPCR, rhodopsin-like, 7TM,IPR019427:7TM GPCR, serpentine receptor class w (Srw),				Complete proteome,Membrane,Receptor,Reference proteome,Transmembrane,Transmembrane helix,
str-19	Seven TM Receptor(str-19)	Caenorhabditis elegans	GO:0007186~G-protein coupled receptor signaling pathway,GO:0042048~olfactory behavior,GO:0050911~detection of chemical stimulus involved in sensory perception of smell,	GO:0005887~integral component of plasma membrane,GO:0016020~membrane,GO:0016021~integral component of membrane,	GO:0038022~G-protein coupled olfactory receptor activity,	IPR019428:7TM GPCR, serpentine receptor class r (Str),				Complete proteome,Membrane,Receptor,Reference proteome,Transmembrane,Transmembrane helix,
C12D5.3	hypothetical protein(C12D5.3)	Caenorhabditis elegans								Complete proteome,Reference proteome,Signal,
F13E9.14	hypothetical protein(F13E9.14)	Caenorhabditis elegans				IPR003677:Domain of unknown function DUF148,				Complete proteome,Reference proteome,Signal,
K08B12.3	hypothetical protein(K08B12.3)	Caenorhabditis elegans	GO:0016311~dephosphorylation,		GO:0016791~phosphatase activity,	IPR006355:HAD-superfamily hydrolase, subfamily IIA, hypothetical 2,IPR006357:HAD-superfamily hydrolase, subfamily IIA,IPR023214:HAD-like domain,IPR023215:Nitrophenylphosphatase-like domain,				Complete proteome,Proteomics identification,Reference proteome,
Y47D7A.12	hypothetical protein(Y47D7A.12)	Caenorhabditis elegans								Complete proteome,Reference proteome,Signal,
ZK105.1	hypothetical protein(ZK105.1)	Caenorhabditis elegans				IPR002542:Domain of unknown function DUF19,IPR016638:Uncharacterised protein family UPF0376,		PIRSF015697:uncharacterized protein,		Complete proteome,Proteomics identification,Reference proteome,Signal,

## Sheet: DAVID enrich oga-1 vs N2 Fed
Annotation Cluster 1	Enrichment Score: 0.28114420101340093
Category	Term	Count	%	PValue	Genes	List Total	Pop Hits	Pop Total	Fold Enrichment	Bonferroni	Benjamini	FDR
UP_KEYWORDS	Receptor	3	33.3333	0.166861	SRW-85, SRD-27, STR-19	9	1887	20248	3.57675	0.865758	0.633609	67.9292
GOTERM_CC_DIRECT	GO:0016021~integral component of membrane	3	33.3333	0.545516	SRW-85, SRD-27, STR-19	4	6032	11373	1.41408	0.980609	0.980609	96.7601
GOTERM_CC_DIRECT	GO:0016020~membrane	3	33.3333	0.556282	SRW-85, SRD-27, STR-19	4	6114	11373	1.39512	0.9828	0.86885	97.0809
UP_KEYWORDS	Transmembrane helix	3	33.3333	0.734627	SRW-85, SRD-27, STR-19	9	5972	20248	1.13016	1	0.992283	99.9742
UP_KEYWORDS	Transmembrane	3	33.3333	0.734927	SRW-85, SRD-27, STR-19	9	5975	20248	1.1296	1	0.974043	99.9744
UP_KEYWORDS	Membrane	3	33.3333	0.752255	SRW-85, SRD-27, STR-19	9	6152	20248	1.0971	1	0.953569	99.9832

## Sheet: Dereg in oga-1 vs N2 Starved
ID	Gene Name	Species	COG_ONTOLOGY	GOTERM_BP_DIRECT	GOTERM_CC_DIRECT	GOTERM_MF_DIRECT	INTERPRO	KEGG_PATHWAY	SMART	UP_KEYWORDS	UP_SEQ_FEATURE
clec-174	C-type LECtin(clec-174)	Caenorhabditis elegans		GO:0006952~defense response,GO:0045087~innate immune response,		GO:0030246~carbohydrate binding,	IPR001304:C-type lectin,IPR016186:C-type lectin-like,IPR016187:C-type lectin fold,		SM00034:CLECT,	Complete proteome,Lectin,Reference proteome,Signal,
clec-86	C-type LECtin(clec-86)	Caenorhabditis elegans		GO:0045087~innate immune response,		GO:0030246~carbohydrate binding,	IPR001304:C-type lectin,IPR016186:C-type lectin-like,IPR016187:C-type lectin fold,		SM00034:CLECT,	Complete proteome,Lectin,Proteomics identification,Reference proteome,Signal,
cyp-34A4	CYtochrome P450 family(cyp-34A4)	Caenorhabditis elegans	Secondary metabolites biosynthesis, transport, and catabolism,	GO:0055114~oxidation-reduction process,		GO:0004497~monooxygenase activity,GO:0005506~iron ion binding,GO:0008395~steroid hydroxylase activity,GO:0016491~oxidoreductase activity,GO:0016705~oxidoreductase activity, acting on paired donors, with incorporation or reduction of molecular oxygen,GO:0020037~heme binding,GO:0046872~metal ion binding,	IPR001128:Cytochrome P450,IPR002401:Cytochrome P450, E-class, group I,IPR017972:Cytochrome P450, conserved site,			Complete proteome,Heme,Iron,Metal-binding,Monooxygenase,Oxidoreductase,Proteomics identification,Reference proteome,
dod-22	Downstream Of DAF-16 (regulated by DAF-16)(dod-22)	Caenorhabditis elegans		GO:0006952~defense response,GO:0008340~determination of adult lifespan,GO:0045087~innate immune response,GO:0050829~defense response to Gram-negative bacterium,			IPR000859:CUB domain,IPR003366:CUB-like domain,			Complete proteome,Proteomics identification,Reference proteome,Signal,
hsp-12.3	Heat Shock Protein(hsp-12.3)	Caenorhabditis elegans				GO:0031072~heat shock protein binding,GO:0051082~unfolded protein binding,	IPR001436:Alpha crystallin/Heat shock protein,IPR002068:Alpha crystallin/Hsp20 domain,IPR008978:HSP20-like chaperone,			Complete proteome,Proteomics identification,Reference proteome,Stress response,
odc-1	Ornithine decarboxylase(odc-1)	Caenorhabditis elegans	Amino acid transport and metabolism,	GO:0006596~polyamine biosynthetic process,GO:0033387~putrescine biosynthetic process from ornithine,	GO:0005737~cytoplasm,	GO:0003824~catalytic activity,GO:0004586~ornithine decarboxylase activity,GO:0016829~lyase activity,GO:0016831~carboxy-lyase activity,	IPR000183:Ornithine/DAP/Arg decarboxylase,IPR002433:Ornithine decarboxylase,IPR009006:Alanine racemase/group IV decarboxylase, C-terminal,IPR022643:Orn/DAP/Arg decarboxylase 2, C-terminal,IPR022644:Orn/DAP/Arg decarboxylase 2, N-terminal,IPR022653:Orn/DAP/Arg decarboxylase 2, pyridoxal-phosphate binding site,	cel00330:Arginine and proline metabolism,cel00480:Glutathione metabolism,cel01100:Metabolic pathways,cel01130:Biosynthesis of antibiotics,		Complete proteome,Decarboxylase,Lyase,Polyamine biosynthesis,Pyridoxal phosphate,Reference proteome,	active site:Proton donor; shared with dimeric partner,chain:Ornithine decarboxylase,modified residue,sequence conflict,
pud-4	Protein Up-regulated in Daf-2(gf)(pud-4)	Caenorhabditis elegans								Complete proteome,Proteomics identification,Reference proteome,
slc-36.4	SLC (SoLute Carrier) homolog(slc-36.4)	Caenorhabditis elegans		GO:0003333~amino acid transmembrane transport,GO:0015807~L-amino acid transport,GO:1902475~L-alpha-amino acid transmembrane transport,	GO:0016020~membrane,GO:0016021~integral component of membrane,	GO:0015171~amino acid transmembrane transporter activity,GO:0015179~L-amino acid transmembrane transporter activity,	IPR013057:Amino acid transporter, transmembrane,			Complete proteome,Membrane,Reference proteome,Transmembrane,Transmembrane helix,
srw-85	Serpentine Receptor, class W(srw-85)	Caenorhabditis elegans		GO:0007186~G-protein coupled receptor signaling pathway,	GO:0016020~membrane,GO:0016021~integral component of membrane,	GO:0008528~G-protein coupled peptide receptor activity,	IPR017452:GPCR, rhodopsin-like, 7TM,IPR019427:7TM GPCR, serpentine receptor class w (Srw),			Complete proteome,Membrane,Receptor,Reference proteome,Transmembrane,Transmembrane helix,
tbb-6	TuBulin, Beta(tbb-6)	Caenorhabditis elegans		GO:0007017~microtubule-based process,GO:0008152~metabolic process,	GO:0005874~microtubule,	GO:0000166~nucleotide binding,GO:0003924~GTPase activity,GO:0005200~structural constituent of cytoskeleton,GO:0005525~GTP binding,	IPR000217:Tubulin,IPR002453:Beta tubulin,IPR003008:Tubulin/FtsZ, GTPase domain,IPR008280:Tubulin/FtsZ, C-terminal,IPR017975:Tubulin, conserved site,IPR018316:Tubulin/FtsZ, 2-layer sandwich domain,IPR023123:Tubulin, C-terminal,	cel04145:Phagosome,	SM00864:SM00864,SM00865:SM00865,	Complete proteome,GTP-binding,Microtubule,Nucleotide-binding,Proteomics identification,Reference proteome,
C15A11.7	hypothetical protein(C15A11.7)	Caenorhabditis elegans			GO:0016020~membrane,GO:0016021~integral component of membrane,		IPR002781:Transmembrane protein TauE like,			Complete proteome,Membrane,Proteomics identification,Reference proteome,Transmembrane,Transmembrane helix,
C17H12.8	hypothetical protein(C17H12.8)	Caenorhabditis elegans		GO:0045087~innate immune response,GO:0050829~defense response to Gram-negative bacterium,	GO:0045121~membrane raft,		IPR003366:CUB-like domain,			Complete proteome,Proteomics identification,Reference proteome,Signal,
F35E8.13	hypothetical protein(F35E8.13)	Caenorhabditis elegans					IPR003582:Metridin-like ShK toxin,		SM00254:ShKT,	Complete proteome,Reference proteome,Signal,
R12E2.14	hypothetical protein(R12E2.14)	Caenorhabditis elegans								Complete proteome,Reference proteome,Signal,
R12E2.15	hypothetical protein(R12E2.15)	Caenorhabditis elegans								Complete proteome,Reference proteome,Signal,
T02B11.4	hypothetical protein(T02B11.4)	Caenorhabditis elegans								Complete proteome,Proteomics identification,Reference proteome,Signal,
T24B8.5	hypothetical protein(T24B8.5)	Caenorhabditis elegans		GO:0045087~innate immune response,			IPR003582:Metridin-like ShK toxin,		SM00254:ShKT,	Complete proteome,Reference proteome,Signal,
hpo-6	hypothetical protein(hpo-6)	Caenorhabditis elegans		GO:0045087~innate immune response,	GO:0045121~membrane raft,		IPR005071:Transmembrane glycoprotein,			Complete proteome,Proteomics identification,Reference proteome,Signal,

## Sheet: David Enrich oga-1 vs N2 Starve
Annotation Cluster 1	Enrichment Score: 0.019899078661963006
Category	Term	Count	%	PValue	Genes	List Total	Pop Hits	Pop Total	Fold Enrichment	Bonferroni	Benjamini	FDR
GOTERM_CC_DIRECT	GO:0016021~integral component of membrane	3	16.6667	0.916639	SRW-85, SLC-36.4, C15A11.7	7	6032	11373	0.808048	0.999996	0.999996	99.998
GOTERM_CC_DIRECT	GO:0016020~membrane	3	16.6667	0.922085	SRW-85, SLC-36.4, C15A11.7	7	6114	11373	0.79721	0.999997	0.998305	99.9985
UP_KEYWORDS	Transmembrane helix	3	16.6667	0.978713	SRW-85, SLC-36.4, C15A11.7	18	5972	20248	0.565081	1	1	100
UP_KEYWORDS	Transmembrane	3	16.6667	0.978775	SRW-85, SLC-36.4, C15A11.7	18	5975	20248	0.564798	1	1	100
UP_KEYWORDS	Membrane	3	16.6667	0.982194	SRW-85, SLC-36.4, C15A11.7	18	6152	20248	0.548548	1	1	100
